# Supplementary material
Source: PubMed Central journal article supplement (PMC2613696)
Supplement: pp.108.129940_1.pdf [file pp.108.129940_1.pdf]

| 20 DAP up (116)                                                |                                                                             |        |       |                                        |
|----------------------------------------------------------------|-----------------------------------------------------------------------------|--------|-------|----------------------------------------|
| Seq. ID                                                        | Gene Annotation                                                             | Factor | P     | Function                               |
| <b>PRIMARY &amp; SECONDARY METABOLISM &amp; TRANSPORT (26)</b> |                                                                             |        |       |                                        |
| P00898 (30,35DAP)                                              | Sucrose-phosphate synthase                                                  | 3.7    | 0.011 | Sucrose metabolism                     |
| P02786                                                         | Sucrose-phosphatase                                                         | 2.1    | 0.018 | Sucrose metabolism                     |
| P01278 (25DAP)                                                 | Sucrose synthase (VfSUS)                                                    | 3.7    | 0.003 | Sucrose metabolism                     |
| P03899                                                         | Glyceraldehyde-3-phosphate dehydrogenase, plastidial                        | 3.8    | 0.012 | Glycolysis                             |
| P01309                                                         | Phosphoglucosyltransferase, cytoplasmic                                     | 2.8    | 0.037 | Glycolysis                             |
| P01595 (25DAP)                                                 | Pyruvate dehydrogenase E1                                                   | 2.4    | 0.007 | Glycolysis                             |
| P02802 (25DAP)                                                 | 2-Oxoglutarate dehydrogenase, E1                                            | 2.1    | 0.007 | TCA cycle                              |
| P02915 (30DAP)                                                 | NADH dehydrogenase (ubiquinone), mitochondrial complex 1, 75 kDa            | 2.6    | 0.029 | NADH oxidation                         |
| P02543                                                         | ATP citrate lyase B                                                         | 3.2    | 0.030 | CH metabolism, citrate degradation     |
| P01521 (30DAP)                                                 | GDP-mannose 3,5-epimerase 2                                                 | 2.8    | 0.014 | Ascorbate synthesis                    |
| P04257                                                         | Malate dehydrogenase (NADP), chloroplast                                    | 2.8    | 0.030 | CH metabolism                          |
| P01320 (25DAP)                                                 | Acetohydroxy- acid synthase small subunit                                   | 3.6    | 0.002 | Ile, Val biosynthesis                  |
| P00936 (25,30DAP)                                              | Methionine synthase                                                         | 2.2    | 0.017 | Methionine synthesis                   |
| P02211                                                         | L-allo-threonine acetaldehyde-lyase                                         | 2.0    | 0.036 | Thr/Gly interconversion                |
| P03092                                                         | Aspartate transaminase                                                      | 2.0    | 0.033 | Amino acid metabolism                  |
| P02005                                                         | L-asparaginase                                                              | 2.0    | 0.019 | Amino acid metabolism                  |
| P01761                                                         | N-carbamoylputrescine amidohydrolase                                        | 3.2    | 0.030 | Polyamine synthesis                    |
| P02136 (25DAP)                                                 | Putrescine aminopropyltransferase 2 (Spermidine synthase)                   | 2.2    | 0.008 | Polyamine synthesis                    |
| P04530                                                         | S-adenosyl-L-homocysteine hydrolase (AdoHcy)                                | 2.1    | 0.035 | Methylation cycle                      |
| P02413                                                         | O-diphenol-O-methyl transferase                                             | 2.1    | 0.032 | Methyltransferase, lignin biosynthesis |
| P01419 (30,35DAP)                                              | DNA (cytosine-5)-methyltransferase                                          | 2.1    | 0.035 | Methyltransferase, DNA biosynthesis    |
| P03466 (30,35DAP)                                              | Glycoside hydrolase                                                         | 3.2    | 0.019 | CH metabolism                          |
| P00472                                                         | Esterase/lipase/thioesterase                                                | 8.2    | 0.018 | Lipid metabolism                       |
| P01851                                                         | Purple acid phosphatase                                                     | 3.4    | 0.028 | Phosphoesterase                        |
| P02042                                                         | Reversibly glycosylated polypeptide                                         | 2.4    | 0.002 | Cell wall synthesis                    |
| P04316 (25DAP)                                                 | Reversibly glycosylated polypeptide                                         | 2.3    | 0.025 | Cell wall synthesis                    |
| <b>TRANSPORT (9)</b>                                           |                                                                             |        |       |                                        |
| P02071 (30DAP)                                                 | Glc-6-phosphate/phosphate-translocator precursor, plastid                   | 5.4    | 0.034 | Metabolite transport, plastidial       |
| P03530                                                         | Hexose transporter                                                          | 4.4    | 0.014 | Sugar transport                        |
| P01343                                                         | Monosaccharid transporter (VfSTP1)                                          | 4.0    | 0.029 | Sugar transport                        |
| P01679                                                         | Xanthine/uracil permease (plasma membrane)                                  | 3.7    | 0.002 | Transport                              |
| P00853 (35DAP)                                                 | Boron transporter                                                           | 2.3    | 0.036 | Transport                              |
| P01923 (25DAP)                                                 | ATP/ADP-transporter, chloroplast                                            | 2.2    | 0.047 | Transport                              |
| P01668                                                         | ABC transporter (plasma membrane)                                           | 2.1    | 0.045 | Transport                              |
| P04427                                                         | ATP synthase, delta (mitochondrion)                                         | 2.0    | 0.031 | ATP synthesis                          |
| P01272                                                         | Import intermediate associated protein, IAP100 (plastid)                    | 7.4    | 0.025 | Protein import                         |
| <b>ENDOMEMBRANE TRANSPORT &amp; PROTEIN PROCESSING (10)</b>    |                                                                             |        |       |                                        |
| P02117 (25DAP)                                                 | Dolichyl-diphosphooligosaccharide--protein glycosyltransferase subunit ST3B | 2.1    | 0.008 | Glycosylation                          |
| P02026                                                         | Chaperonin 10 (chloroplast)                                                 | 3.1    | 0.047 | Chaperone                              |
| P02333 (25,30,35DAP)                                           | Chaperonin 10 (chloroplast)                                                 | 2.4    | 0.033 | Chaperone                              |
| P01640                                                         | Chaperonin delta-subunit, cytosolic                                         | 2.3    | 0.045 | Chaperone                              |
| P00166 (25,30DAP)                                              | Chaperone PHSP1, mitochondrial                                              | 2.3    | 0.030 | Chaperone                              |
| P02763 (25,30DAP)                                              | Chaperone multifunctional (14-3-3 family)                                   | 3.3    | 0.048 | Chaperone                              |
| P00386 (25,30DAP)                                              | Vesicle transport v-SNARE                                                   | 3.3    | 0.024 | Vesicle trafficking                    |
| P00502 (35DAP)                                                 | SNAP25 (SNARE) Vesicle trafficking protein                                  | 2.0    | 0.012 | Vesicle trafficking                    |
| P00846                                                         | Vacuolar protein sorting-associating protein                                | 2.1    | 0.018 | Vesicle trafficking                    |
| P03208                                                         | Legumain                                                                    | 2.3    | 0.017 | Storage protein processing             |
| <b>REGULATED PROTEIN DEGRADATION (10)</b>                      |                                                                             |        |       |                                        |
| P02118                                                         | Ubiquitin                                                                   | 2.2    | 0.023 | Ubiquitin mediated protein degradation |
| P02435 (25,30DAP)                                              | Ubiquitin                                                                   | 2.2    | 0.000 | Ubiquitin mediated protein degradation |
| P01166                                                         | Ubiquitin-protein ligase                                                    | 2.4    | 0.048 | Ubiquitin mediated protein degradation |
| P04406                                                         | 20S proteasome alpha subunit                                                | 2.0    | 0.001 | Ubiquitin mediated protein degradation |
| P01831                                                         | 20S proteasome, beta                                                        | 2.3    | 0.030 | Ubiquitin mediated protein degradation |
| P01006 (25,30DAP)                                              | N-acyl-L-amino-acid amidohydrolase                                          | 3.4    | 0.002 | Peptidase                              |
| P02142 (30DAP)                                                 | Peptidase/protease (Insulin degrading enzyme)                               | 5.4    | 0.034 | Proteinase                             |
| P02453 (25,30DAP)                                              | Serine carboxypeptidase (S10)                                               | 4.7    | 0.006 | Proteinase                             |
| P02234 (25,30DAP)                                              | Leucine aminopeptidase                                                      | 123.8  | 0.009 | Proteinase                             |
| P02043 (25DAP)                                                 | Oligopeptidase A                                                            | 4.7    | 0.008 | Proteinase                             |
| <b>CELL PROLIFERATION (9)</b>                                  |                                                                             |        |       |                                        |
| P03116 (25,30,35DAP)                                           | Annexin                                                                     | 3.6    | 0.004 | Cell proliferation                     |
| P00079 (25DAP)                                                 | Annexin                                                                     | 2.1    | 0.004 | Cell proliferation                     |
| P00033 (25,35DAP)                                              | Tubulin beta                                                                | 2.5    | 0.001 | Cell proliferation                     |
| P04421 (25DAP)                                                 | Actin                                                                       | 2.1    | 0.038 | Cell proliferation                     |
| P02409                                                         | Actin-depolymerizing factor                                                 | 4.0    | 0.010 | Cell proliferation                     |
| P02077                                                         | Ca(2+)-regulated actin-binding protein                                      | 3.0    | 0.019 | Cell proliferation                     |
| P01979                                                         | Exoribonuclease                                                             | 3.7    | 0.000 | Cell proliferation                     |
| P00843 (30DAP)                                                 | Cell division cycle protein                                                 | 2.1    | 0.031 | Cell proliferation                     |
| P03980                                                         | Flap endonuclease 1a                                                        | 2.3    | 0.018 | DNA synthesis                          |
| <b>STORAGE RELATED (5)</b>                                     |                                                                             |        |       |                                        |
| P02195 (25,30DAP)                                              | Vicilin                                                                     | 3.6    | 0.001 | Storage protein                        |
| P00940 (25,35DAP)                                              | USP                                                                         | 7.4    | 0.005 | Storage protein                        |
| P01844 (30,35DAP)                                              | USP                                                                         | 6.2    | 0.027 | Storage protein                        |
| P01245 (30DAP)                                                 | Ferritin 3                                                                  | 4.8    | 0.001 | Storage protein                        |
| P02120 (25,30DAP)                                              | GDSL-motif lipase/hydrolase                                                 | 2.5    | 0.047 | Lipid metabolism                       |
| <b>DISEASE &amp; STRESS RESPONSE (7)</b>                       |                                                                             |        |       |                                        |
| P00931                                                         | (Benzo)quinone oxidoreductase                                               | 2.8    | 0.015 | ROS response                           |
| P02086                                                         | Aldo/keto reductase                                                         | 2.1    | 0.004 | Oxidoreductase                         |
| P03401                                                         | Alcohol dehydrogenase class III                                             | 2.2    | 0.015 | Alcohol dehydrogenase                  |
| P01432 (30DAP)                                                 | Thioredoxin                                                                 | 4.4    | 0.004 | Redox regulation                       |
| P00051                                                         | Methionine sulfoxide reductase A                                            | 3.0    | 0.025 | Oxidoreductase                         |
| P01347                                                         | Pyridoxal biosynthesis protein PDX1                                         | 2.1    | 0.047 | Photoprotection                        |
| P02655 (25DAP)                                                 | Dehydration-responsive protein RD22                                         | 2.3    | 0.049 | Drought response                       |
| <b>SIGNALING AND HORMONAL FUNCTIONS (10)</b>                   |                                                                             |        |       |                                        |
| P02122 (25,30DAP)                                              | MYB-112/50 TF, Tuber-specific and sucrose-responsive element binding factor | 3.1    | 0.001 | Transcription factor                   |
| P01965                                                         | Ser/Thr-protein kinase SAPK7, Osmotic stress/ABA-activated protein kinase 7 | 2.6    | 0.008 | Protein phosphorylation                |
| P02807 (30,35DAP)                                              | Ca-dependent protein kinase CPK1                                            | 2.5    | 0.038 | Protein phosphorylation                |
| P00010 (30DAP)                                                 | Receptor-like protein kinase 4 RPK4                                         | 2.1    | 0.014 | Protein phosphorylation                |
| P01017                                                         | Ser/Thr protein phosphatase                                                 | 2.3    | 0.012 | Protein phosphorylation                |
| P02146                                                         | Protein phosphatase 2A                                                      | 2.1    | 0.004 | Protein phosphorylation                |
| P04716 (25DAP)                                                 | S-adenosyl-L- methionine:jasmonic acid carboxyl methyltransferase           | 2.9    | 0.004 | JA synthesis                           |
| P01789                                                         | Leunig/STYLOSA                                                              | 2.5    | 0.032 | Homeotic functions                     |
| P04005 (30DAP)                                                 | Ent-kaurenoic acid oxidase, CyP450 88A3                                     | 2.4    | 0.050 | GA synthesis                           |
| P01030                                                         | Diacylglycerol kinase                                                       | 2.1    | 0.013 | Lipid signaling                        |
| <b>PHOTOSYNTHESIS (3)</b>                                      |                                                                             |        |       |                                        |
| P01497 (30DAP)                                                 | Ferredoxin-1, plastidial                                                    | 2.0    | 0.003 | Photosynthesis                         |
| P01410 (25DAP)                                                 | PS I reaction center subunit V                                              | 2.0    | 0.023 | Photosynthesis                         |
| P02149 (25DAP)                                                 | Red chlorophyll catabolite reductase                                        | 3.1    | 0.007 | Chlorophyll catabolism                 |
| <b>TRANSCRIPTION &amp; TRANSLATION &amp; HISTONES (27)</b>     |                                                                             |        |       |                                        |

|                   |                                        |     |       |                      |
|-------------------|----------------------------------------|-----|-------|----------------------|
| P01225            | PRP4 pre- mRNA-processing factor 4     | 6.0 | 0.010 | Translation          |
| P01928            | Translation initiation factor IF-3.    | 2.2 | 0.012 | Translation          |
| P01123            | Elongation factor 1-alpha              | 2.0 | 0.038 | Translation          |
| P01558            | Lysyl-tRNA synthetase                  | 3.7 | 0.032 | Translation          |
| P01409            | tRNA (guanine-N(7)-)-methyltransferase | 2.5 | 0.016 | Translation          |
| P00741 (30,35DAP) | Peptidyl-tRNA hydrolase                | 2.3 | 0.005 | Translation          |
| P02316            | Small nuclear ribonucleoprotein        | 3.4 | 0.016 | Ribosomal protein    |
| P02072            | Ribosomal protein 60S acidic           | 3.3 | 0.025 | Ribosomal protein    |
| P02199            | Ribosomal protein L30 (60S)            | 3.2 | 0.018 | Ribosomal protein    |
| P02048            | Ribosomal protein L30 (60S)            | 2.2 | 0.009 | Ribosomal protein    |
| P02139            | Ribosomal protein L23                  | 2.8 | 0.001 | Ribosomal protein    |
| P01096            | Ribosomal protein L24, chloroplast     | 2.3 | 0.013 | Ribosomal protein    |
| P00082            | Ribosomal protein L35, plast.          | 2.1 | 0.014 | Ribosomal protein    |
| P04092            | Ribosomal protein L19                  | 2.0 | 0.002 | Ribosomal protein    |
| P04063            | Histone-lysine N-methyltransferase     | 2.1 | 0.018 | Histone              |
| P01812            | HMG1/Y protein                         | 2.8 | 0.010 | Histone              |
| P01651            | Nucleosome assembly protein            | 2.5 | 0.000 | Chromatin remodeling |
| P02006            | Histone H2A                            | 3.1 | 0.050 | Histone              |
| P02404            | Histone H1                             | 2.9 | 0.034 | Histone              |
| P01296            | Histone H4                             | 2.3 | 0.020 | Histone              |
| P01546            | Histone H2A                            | 2.7 | 0.008 | Histone              |
| P03596            | Histone H2B                            | 2.6 | 0.009 | Histone              |
| P04684            | Histone H2A                            | 2.2 | 0.005 | Histone              |
| P01899            | Histone H2B                            | 2.1 | 0.022 | Histone              |
| P03703            | Histone H2B.                           | 3.0 | 0.011 | Histone              |
| P02138            | Histone H2A                            | 4.9 | 0.033 | Histone              |
| P02173            | Histone H2B1                           | 4.2 | 0.028 | Histone              |

#### Upregulated, no annotation (87)

#### 20 DAP down (72)

| Seq. ID                                                    | Gene Annotation                                       | Factor | P     | Function                               |
|------------------------------------------------------------|-------------------------------------------------------|--------|-------|----------------------------------------|
| <b>PRIMARY &amp; SECONDARY METABOLISM (8)</b>              |                                                       |        |       |                                        |
| P03795                                                     | Phosphoglycerate mutase                               | 2.3    | 0.043 | Glycolysis                             |
| P05197                                                     | ADP-glucose pyrophosphorylase                         | 5.9    | 0.000 | Starch metabolism                      |
| P04162 (25DAP)                                             | ADP-glucose pyrophosphorylase                         | 5.1    | 0.001 | Starch metabolism                      |
| P04337                                                     | 6-phosphogluconate dehydrogenase                      | 2.3    | 0.025 | Pentose-P cycle                        |
| P04168                                                     | Chalcone-flavanone isomerase                          | 2.0    | 0.014 | Flavonoid biosynthesis                 |
| P04622                                                     | 3-isopropylmalate dehydratase                         | 7.2    | 0.007 | Branched-chain amino acid biosynthesis |
| P05158 (25DAP)                                             | Cytochrome P450 (CYP71B2)                             | 3.1    | 0.003 | Broad functions                        |
| P03541                                                     | Cytochrome P450 94A1                                  | 2.3    | 0.048 | Broad functions                        |
| <b>TRANSPORT (7)</b>                                       |                                                       |        |       |                                        |
| P05196                                                     | Oligopeptide transporter 4 (ATOPT4).                  | 2.1    | 0.002 | Peptide transport                      |
| P01176 (25DAP)                                             | OEP16.2, amino acid selective channel                 | 2.9    | 0.039 | Plastidial outer membrane protein      |
| P02349                                                     | Plasma membrane H <sup>+</sup> -ATPase                | 5.0    | 0.002 | H <sup>+</sup> transport               |
| P04384                                                     | Tonoplast intrinsic protein alpha (Alpha TIP)         | 2.6    | 0.004 | Vacuolar transport                     |
| P04008                                                     | Vacuolar ATPase subunit H                             | 2.1    | 0.033 | Vacuolar transport                     |
| P00510                                                     | Boron transporter-like protein                        | 3.9    | 0.007 | Metal transport                        |
| P00469 (30DAP)                                             | Zinc transporter 4, chloroplast                       | 2.9    | 0.018 | Metal transport                        |
| <b>ENDOMEMBRANE TRANSPORT &amp; PROTEIN PROCESSING (5)</b> |                                                       |        |       |                                        |
| P04129                                                     | Small G-protein ROP3                                  | 2.1    | 0.018 | Vesicle transport                      |
| P05151                                                     | ADP-ribosylation factor GTP binding protein)          | 2.2    | 0.002 | Vesicle transport                      |
| P04986                                                     | Chaperone multifunctional (14-3-3 family)             | 2.0    | 0.001 | Chaperone                              |
| P01559                                                     | Vesicle transport protein /ER/Golgi)                  | 2.3    | 0.011 | Vesicle transport                      |
| P00059 (25,30,35DAP)                                       | Peptidyl-prolyl cis-trans isomerase                   | 2.5    | 0.015 | Protein processing                     |
| P03208                                                     | Legumain                                              | 2.4    | 0.020 | Storage protein processing             |
| <b>REGULATED PROTEIN DEGRADATION (9)</b>                   |                                                       |        |       |                                        |
| P02453 (25,30DAP)                                          | Serine carboxypeptidase 1                             | 3.0    | 0.020 | Proteinase                             |
| P02708 (25,30,35DAP)                                       | Prolyl Oligopeptidase                                 | 2.6    | 0.032 | Proteinase                             |
| P01932 (30,35DAP)                                          | Ubiquitin-protein ligase/ zinc ion binding            | 2.5    | 0.049 | Ubiquitin mediated protein degradation |
| P01451 (25DAP)                                             | Cullin 3B                                             | 2.3    | 0.040 | Ubiquitin mediated protein degradation |
| P02115                                                     | Aspartic protease                                     | 2.1    | 0.048 | Proteinase                             |
| P03124 (25DAP)                                             | 20S core proteasome subunit alpha 2                   | 2.0    | 0.049 | Ubiquitin mediated protein degradation |
| P03922                                                     | Aminoacylproline aminopeptidase                       | 2.0    | 0.001 | Proteinase                             |
| P02732                                                     | 26S proteasome regulatory subunit                     | 1.9    | 0.003 | Ubiquitin mediated protein degradation |
| P03243 (25,30,35DAP)                                       | Ubiquitin-conjugating enzyme E2                       | 3.0    | 0.007 | Ubiquitin mediated protein degradation |
| <b>CELL PROLIFERATION (5)</b>                              |                                                       |        |       |                                        |
| P03363 (30DAP)                                             | Expansin                                              | 3.3    | 0.003 | Cell expansion                         |
| P05195                                                     | Glucan endo-1,3-beta-glucosidase                      | 2.2    | 0.001 | Cell wall metabolism                   |
| P04715 (25DAP)                                             | Beta-xylosidase/alpha-L-arabinosidase                 | 2.2    | 0.016 | Cell wall metabolism                   |
| P00443                                                     | Pectinesterase                                        | 2.7    | 0.033 | Cell wall metabolism                   |
| P05130 (25DAP)                                             | Tubulin, beta                                         | 2.6    | 0.008 | Cell proliferation                     |
| <b>STORAGE RELATED (13)</b>                                |                                                       |        |       |                                        |
| P04998                                                     | Legumin B                                             | 4.5    | 0.000 | Storage protein                        |
| P04997 (25DAP)                                             | Legumin B                                             | 3.8    | 0.003 | Storage protein                        |
| P04448 (25,30DAP)                                          | Legumin A2                                            | 3.5    | 0.012 | Storage protein                        |
| P02001 (25DAP)                                             | Legumin B                                             | 3.0    | 0.020 | Storage protein                        |
| PCPS13 (35DAP)                                             | Legumin B                                             | 2.2    | 0.003 | Storage protein                        |
| P04995                                                     | Legumin K                                             | 2.0    | 0.004 | Storage protein                        |
| P04441 (25,30DAP)                                          | Albumin 2                                             | 23.8   | 0.003 | Storage protein                        |
| P04535 (25DAP)                                             | Albumin                                               | 17.7   | 0.001 | Storage protein                        |
| P04532 (25,30DAP)                                          | Glycinin                                              | 17.2   | 0.002 | Storage protein                        |
| P00507                                                     | Patatin-like protein                                  | 2.4    | 0.029 | Storage protein                        |
| P04150 (25DAP)                                             | Oleosin                                               | 3.9    | 0.000 | Lipid storage                          |
| P04214                                                     | Oleosin                                               | 2.6    | 0.002 | Lipid storage                          |
| P02768                                                     | Lipoxygenase                                          | 2.5    | 0.032 | Lipid storage                          |
| <b>DISEASE &amp; STRESS TOLERANCE (8)</b>                  |                                                       |        |       |                                        |
| P00404 (25DAP)                                             | Protease inhibitor I3 (Kunitz-type)                   | 3.2    | 0.009 | Disease response                       |
| P04697                                                     | Metallothionein                                       | 2.7    | 0.019 | Detoxification                         |
| P04811 (30DAP)                                             | Dehydration-responsive protein RD22                   | 3.2    | 0.000 | Drought response                       |
| P04644 (25,30,35DAP)                                       | Disease resistance response protein 206-d             | 8.4    | 0.009 | Disease response                       |
| P04184                                                     | Pathogenesis-related protein PR-1                     | 2.7    | 0.035 | Disease response                       |
| P00761                                                     | Pathogenesis-related protein (MLO-like protein)       | 2.1    | 0.015 | Disease response                       |
| P02520                                                     | Polygalacturonase inhibitor                           | 2.4    | 0.029 | Disease response                       |
| P05133                                                     | Polygalacturonase inhibitor                           | 2.0    | 0.010 | Disease response                       |
| <b>SIGNALING AND HORMONAL FUNCTIONS (10)</b>               |                                                       |        |       |                                        |
| P02114 (35DAP)                                             | Two-component response regulator ARR5                 | 10.6   | 0.045 | CK functions                           |
| P03467 (25DAP)                                             | Indole-3-acetic acid-amido synthetase                 | 5.0    | 0.039 | Auxin degradation                      |
| P00915 (30DAP)                                             | Protein kinase APK1A, chloroplast                     | 3.2    | 0.040 | Protein phosphorylation                |
| P05015 (25DAP)                                             | Short-chain dehydrogenase/reductase (tasselseed)      | 2.2    | 0.049 | Broad functions                        |
| PCPS10                                                     | SNF1-related protein kinase regulatory subunit beta-1 | 2.6    | 0.023 | Protein kinase                         |
| P03764                                                     | GSK-3-like protein kinase, Msk4                       | 2.4    | 0.017 | Protein kinase                         |

|                                                           |                                                     |     |       |                                        |
|-----------------------------------------------------------|-----------------------------------------------------|-----|-------|----------------------------------------|
| PCPS04                                                    | Phosphatidylethanolamine-binding protein            | 2.3 | 0.013 | Lipid signaling                        |
| PCPS24 (25DAP)                                            | UNIFOLIATA                                          | 2.2 | 0.007 | Development                            |
| P04812                                                    | GRAS family transcription factor / DELLA/ /GAI      | 2.0 | 0.016 | Repressor of GA functions              |
| P04604                                                    | 12-oxophytodienoic acid 10, 11-reductase, OPR1      | 2.4 | 0.000 | JA Biosynthesis                        |
| P04941 (25DAP)                                            | 26S proteasome regulatory subunit S5A               | 2.5 | 0.001 | Ubiquitin mediated protein degradation |
| <b>PHOTOSYTHESIS (3)</b>                                  |                                                     |     |       |                                        |
| P04368 (25,30DAP)                                         | Rubisco                                             | 3.2 | 0.012 | Photosynthesis                         |
| P05030                                                    | Photosystem II core complex proteins psbY           | 2.5 | 0.036 | Photosynthesis                         |
| P04462 (25,30DAP)                                         | PS II subunit (22kDa)                               | 2.2 | 0.006 | Photosynthesis                         |
| <b>TRANSCRIPTION &amp; TRANSLATION &amp; HISTONES (4)</b> |                                                     |     |       |                                        |
| P02752                                                    | Eukaryotic elongation factor 1A                     | 2.5 | 0.013 | Translation                            |
| P01853                                                    | 30S ribosomal protein S9, chloroplast               | 2.3 | 0.001 | Ribosomal protein                      |
| P04315                                                    | Ribosomal protein S27                               | 2.3 | 0.008 | Ribosomal protein                      |
| P04134 (30DAP)                                            | WD-40 repeat protein MSI1 (Core histone-binding su) | 2.1 | 0.000 | Histone binding protein                |
| <b>Downregulated, no annotation (47)</b>                  |                                                     |     |       |                                        |

**25 DAP up (273)**

| Seq. ID                                                        | Gene Annotation                                                             | Factor | P     | Function                               |
|----------------------------------------------------------------|-----------------------------------------------------------------------------|--------|-------|----------------------------------------|
| <b>PRIMARY &amp; SECONDARY METABOLISM &amp; TRANSPORT (41)</b> |                                                                             |        |       |                                        |
| P01278 (20DAP)                                                 | Sucrose synthase                                                            | 10.8   | 0.001 | Sucrose metabolism                     |
| PCPS16                                                         | Sucrose synthase                                                            | 3.0    | 0.003 | Sucrose metabolism                     |
| P03580                                                         | Sucrose synthase                                                            | 2.5    | 0.009 | Sucrose metabolism                     |
| P00908                                                         | Glyceraldehyde-3-phosphate DH (NADP+), chloroplast                          | 3.4    | 0.046 | Glycolysis                             |
| P00460                                                         | Glyceraldehyde-3-phosphate DH (NADP+), chloroplast                          | 2.6    | 0.020 | Glycolysis                             |
| P02370 (30DAP)                                                 | Glucose-6-phosphate isomerase, cytosolic                                    | 2.0    | 0.017 | Glycolysis                             |
| P02459 (30,35DAP)                                              | Glycerlaldehyde-3-phosphate DH, cytosolic                                   | 2.9    | 0.002 | Glycolysis                             |
| P01595 (20DAP)                                                 | Pyruvate dehydrogenase E1 alpha                                             | 2.8    | 0.003 | Glycolysis                             |
| P01033                                                         | Pyruvate dehydrogenase E2, dihydrolipoyllysine acetyltransferase            | 2.1    | 0.002 | TCA cycle                              |
| P02802 (20DAP)                                                 | 2-Oxoglutarate dehydrogenase, E1                                            | 2.3    | 0.006 | TCA cycle                              |
| P01798                                                         | Malate dehydrogenase, plastidial                                            | 6.2    | 0.007 | CH metabolism                          |
| P01847 (30,35DAP)                                              | Nudix hydrolase, nucleoside sugar hydratase                                 | 2.3    | 0.008 | Nucleoside sugar catabolism            |
| P01976 (30,35DAP)                                              | Starch phosphorylase, L chloroplast                                         | 3.8    | 0.004 | Starch metabolism                      |
| P02064 (30DAP)                                                 | O-acetylserine (Thiol)-lyase (Cys synthase), plastidial (ASTL)              | 7.1    | 0.031 | Cys biosynthesis                       |
| P02204                                                         | Serine acetyltransferase, cytoplasm                                         | 7.0    | 0.003 | Cys biosynthesis                       |
| P03651                                                         | Serine acetyltransferase, mitochondrial                                     | 2.1    | 0.013 | Cys biosynthesis                       |
| P04298 (30DAP)                                                 | 5'-adenylsulfate reductase 1, chloroplast                                   | 2.1    | 0.009 | Cys biosynthesis                       |
| P00936 (20,30DAP)                                              | Methionine synthase                                                         | 3.5    | 0.004 | Met biosynthesis                       |
| P04228                                                         | Methionine synthase                                                         | 2.1    | 0.035 | Met biosynthesis                       |
| P02505 (30DAP)                                                 | Ketol-acid reductoisomerase, chloroplast                                    | 3.3    | 0.013 | Leu/Val/Ile biosynthesis               |
| P04292 (30DAP)                                                 | Argininosuccinate synthase, chloroplast                                     | 2.9    | 0.011 | Arg biosynthesis                       |
| P01261 (30DAP)                                                 | Argininosuccinate synthase, chloroplast                                     | 2.3    | 0.022 | Arg biosynthesis                       |
| P00532                                                         | Bifunctional ornithine acetyltransferase/N-acetylglutamate synthase         | 2.0    | 0.048 | Arg biosynthesis                       |
| P01320 (20DAP)                                                 | Acetohydroxy- acid synthase small subunit                                   | 2.7    | 0.049 | Ile, Val biosynthesis                  |
| P02083                                                         | 3-Dehydroquinate synthase                                                   | 2.2    | 0.001 | Aromatic amino acid biosynthesis       |
| P02005                                                         | L-asparaginase                                                              | 2.0    | 0.002 | Amino acid metabolism                  |
| P00938 (30DAP)                                                 | 4-coumaroyl- CoA synthase 3                                                 | 5.6    | 0.018 | Phenylpropanoid metabolism             |
| P04682                                                         | Phenylalanine ammonia-lyase                                                 | 4.9    | 0.018 | Phenylpropanoid metabolism             |
| P02136 (20DAP)                                                 | Putrescine aminopropyltransferase 2, (Spermidine synthase)                  | 2.5    | 0.024 | Polyamine biosynthesis                 |
| P00743                                                         | Copper amine oxidase                                                        | 3.5    | 0.028 | Oxidative deamination of polyamines    |
| P02413                                                         | O-diphenol-O-methyl transferase                                             | 2.3    | 0.016 | Methyltransferase                      |
| P02713 (35DAP)                                                 | NADH-ubiquinone oxidoreductase, complex 1 75 kDa                            | 2.3    | 0.029 | NADH oxidation                         |
| P01416 (30,35DAP)                                              | Adenylate kinase (ATP- AMP transphosphorylase), chloroplast                 | 2.0    | 0.014 | Nucleotide metabolism                  |
| P01076 (35DAP)                                                 | FA/sphingolipid desaturase                                                  | 3.4    | 0.023 | FA metabolism                          |
| P01721                                                         | Long-chain-fatty-acid-CoA ligase 3                                          | 3.2    | 0.008 | FA metabolism                          |
| P02795                                                         | Oleoyl-acyl carrier protein thioesterase, chloroplast                       | 5.5    | 0.006 | FA metabolism                          |
| P01020                                                         | Omega-6 fatty acid desaturase, chloroplast                                  | 2.0    | 0.035 | FA metabolism                          |
| P04316 (20DAP)                                                 | Reversibly glycosylated polypeptide-2                                       | 9.8    | 0.047 | Cell wall metabolism                   |
| P02042                                                         | Reversibly glycosylatable polypeptide (Amylogenin)                          | 4.9    | 0.044 | Cell wall metabolism                   |
| P02328 (30DAP)                                                 | Reversibly glycosylatable polypeptide 1                                     | 2.5    | 0.023 | Cell wall metabolism                   |
| P01258                                                         | Beta-D-glucosidase                                                          | 2.7    | 0.050 | Cell wall metabolism                   |
| <b>TRANSPORT (10)</b>                                          |                                                                             |        |       |                                        |
| P00784 (30,35DAP)                                              | Peptide transporter PTR2                                                    | 8.3    | 0.010 | Peptide transport                      |
| P01453                                                         | F1F0 ATP synthase, delta chain, chloroplast                                 | 7.9    | 0.021 | ATP synthesis                          |
| P02609                                                         | F1F0 ATP synthase, delta chain, chloroplast                                 | 2.5    | 0.031 | ATP synthesis                          |
| P04485 (30,35DAP)                                              | F1F0-ATP synthase, delta chain, mitochondrial                               | 10.0   | 0.005 | ATP synthesis                          |
| P04234                                                         | F1F0 ATP synthase, gamma chain, mitochondrial                               | 2.1    | 0.044 | ATP synthesis                          |
| P03984                                                         | F1F0 ATP synthase, beta chain, mitochondrial                                | 2.0    | 0.000 | ATP synthesis                          |
| P01149                                                         | H+-transporting ATPase, plasma membrane                                     | 5.3    | 0.017 | ATP synthesis                          |
| P02092 (30DAP)                                                 | P-type H+-ATPase, plasma membrane                                           | 2.2    | 0.033 | H+ transport                           |
| P01923 (20DAP)                                                 | ATP/ADP-transporter, chloroplast                                            | 3.5    | 0.020 | ADP/ATP transport                      |
| P02225 (30,35DAP)                                              | Uncoupling protein, mitochondrial                                           | 4.1    | 0.003 | Respiratory control                    |
| <b>ENDOMEMBRANE TRANSPORT &amp; PROTEIN PROCESSING (25)</b>    |                                                                             |        |       |                                        |
| P00689 (30,35DAP)                                              | Coatomer subunit gamma                                                      | 19.7   | 0.007 | Vesicle trafficking                    |
| P04006                                                         | Vacuolar protein-sorting protein VPS29                                      | 3.4    | 0.010 | Vesicle trafficking                    |
| P01402                                                         | sec23/sec24 transport family protein                                        | 2.8    | 0.033 | Vesicle trafficking                    |
| P01573 (30,35DAP)                                              | Signal peptide peptidase                                                    | 2.3    | 0.001 | Vesicle trafficking                    |
| P01828                                                         | GTP-binding protein                                                         | 2.2    | 0.042 | Vesicle trafficking                    |
| P01677 (30DAP)                                                 | GTP-binding protein ras1                                                    | 13.3   | 0.031 | Vesicle trafficking                    |
| P00781                                                         | ER lumen protein retaining receptor                                         | 17.9   | 0.003 | Vesicle trafficking                    |
| P00166 (20,30DAP)                                              | Chaperone PHSP1,mitochondrial                                               | 3.9    | 0.030 | Chaperone                              |
| P01809                                                         | Chaperone DnaJ                                                              | 2.5    | 0.035 | Chaperone                              |
| P04537                                                         | Chaperonin Cpn60/TCP-1                                                      | 2.0    | 0.007 | Chaperone                              |
| P02333                                                         | Chaperonin 10, chloroplast                                                  | 2.0    | 0.024 | Chaperone                              |
| P02026                                                         | Chaperonin 20kDa, chloroplast                                               | 2.4    | 0.011 | Chaperone                              |
| P02607                                                         | Chaperonin 60 alpha, chloroplast                                            | 11.4   | 0.014 | Chaperone                              |
| P03657 (30,35DAP)                                              | Chaperone (copper)                                                          | 8.6    | 0.015 | Chaperone                              |
| P02763 (20,30DAP)                                              | Chaperone multifunctional (14-3-3 family)                                   | 2.2    | 0.007 | Chaperone                              |
| P00619                                                         | Heat shock protein Hsp90                                                    | 3.9    | 0.013 | Chaperone                              |
| P01143 (20DAP)                                                 | Heat shock protein DnaJ                                                     | 3.7    | 0.040 | Chaperone                              |
| P02110                                                         | Heat shock protein 17K                                                      | 2.1    | 0.015 | Chaperone                              |
| P04523 (30DAP)                                                 | Calreticulin                                                                | 4.5    | 0.011 | Ca-binding chaperone (ER)              |
| P02258 (30,35DAP)                                              | Calreticulin                                                                | 14.5   | 0.005 | Ca-binding chaperone(ER)               |
| P04206                                                         | Calnexin                                                                    | 3.5    | 0.050 | Ca-binding chaperone(ER)               |
| P02117 (20DAP)                                                 | Dolichyl-diphosphooligosaccharide-protein glycosyltransferase subunit STT3B | 6.0    | 0.000 | Protein processing                     |
| P04457                                                         | Dolichyl-diphosphooligosaccharide-protein glycosyltransferase               | 3.2    | 0.030 | Protein processing                     |
| P04656                                                         | Disulfide-isomerase                                                         | 3.6    | 0.019 | Protein processing                     |
| P04217 (30DAP)                                                 | Disulfide-isomerase                                                         | 3.4    | 0.001 | Protein processing                     |
| <b>REGULATED PROTEIN DEGRADATION (15)</b>                      |                                                                             |        |       |                                        |
| P02435 (20,30DAP)                                              | Ubiquitin                                                                   | 2.1    | 0.008 | Ubiquitin mediated protein degradation |
| P03243                                                         | Ubiquitin-conjugating enzyme E2                                             | 3.4    | 0.006 | Ubiquitin mediated protein degradation |
| P00690 (35DAP)                                                 | Ubiquitin-protein ligase E3                                                 | 2.6    | 0.001 | Ubiquitin mediated protein degradation |
| P03124                                                         | 20S core proteasome subunit alpha 2                                         | 2.8    | 0.025 | Ubiquitin mediated protein degradation |
| P02732                                                         | 26S proteasome regulatory particle non-ATPase subunit                       | 2.4    | 0.014 | Ubiquitin mediated protein degradation |
| P01451                                                         | Cullin 3B                                                                   | 5.1    | 0.022 | Ubiquitin mediated protein degradation |
| P01009                                                         | Suppressor of G2 allele of SKP1                                             | 3.3    | 0.002 | Ubiquitin mediated protein degradation |
| P01877                                                         | Suppressor of G2 allele of SKP1                                             | 2.5    | 0.028 | Ubiquitin mediated protein degradation |
| P01006 (20,30DAP)                                              | N-acyl-L-amino-acid amidohydrolase                                          | 2.9    | 0.001 | Peptidase                              |
| P02234 (20,30DAP)                                              | Leucine aminopeptidase                                                      | 35.3   | 0.018 | Proteinase                             |

|                                                             |                                                                             |      |       |                             |
|-------------------------------------------------------------|-----------------------------------------------------------------------------|------|-------|-----------------------------|
| P02453 (20,30DAP)                                           | Serine carboxipeptidase 1                                                   | 4.1  | 0.025 | Proteinase                  |
| P04496 (30DAP)                                              | Cysteine proteinase 15A (Turgor-responsive protein 15A)                     | 3.5  | 0.018 | Proteinase                  |
| P02043 (20DAP)                                              | Oligopeptidase A                                                            | 2.8  | 0.021 | Proteinase                  |
| P01338 (30DAP)                                              | Mitochondrial-processing peptidase                                          | 2.3  | 0.047 | Proteinase                  |
| P02708                                                      | Prolyl endopeptidase                                                        | 2.0  | 0.036 | Proteinase                  |
| <b>CELL PROLIFERATION (11)</b>                              |                                                                             |      |       |                             |
| P03116                                                      | Annexin                                                                     | 6.2  | 0.001 | Cell proliferation          |
| P04306 (30DAP)                                              | Annexin                                                                     | 4.1  | 0.002 | Cell proliferation          |
| P00079 (20DAP)                                              | Annexin                                                                     | 2.0  | 0.006 | Cell proliferation          |
| P01280                                                      | Annexin                                                                     | 2.5  | 0.027 | Cell proliferation          |
| P00178 (30,35DAP)                                           | Annexin                                                                     | 2.3  | 0.016 | Cell proliferation          |
| P02637                                                      | Tubulin beta-1                                                              | 2.7  | 0.022 | Cell proliferation          |
| P00033 (20,35DAP)                                           | Tubulin beta-1                                                              | 2.7  | 0.011 | Cell proliferation          |
| P04322 (30DAP)                                              | Tubulin beta                                                                | 2.0  | 0.017 | Cell proliferation          |
| P04421 (20DAP)                                              | Actin                                                                       | 4.5  | 0.023 | Cell proliferation          |
| P02077                                                      | Ca(2+)-regulated actin-binding protein                                      | 2.3  | 0.005 | Cell proliferation          |
| P04096                                                      | AAA-type ATPase / Cell division control protein                             | 2.0  | 0.013 | Cell proliferation          |
| <b>STORAGE RELATED (6)</b>                                  |                                                                             |      |       |                             |
| P04038 (30,35DAP)                                           | Vicilin A                                                                   | 4.4  | 0.005 | Storage protein             |
| P02195 (20,30DAP)                                           | Vicilin                                                                     | 3.9  | 0.004 | Storage protein             |
| P00430                                                      | Albumin 1                                                                   | 3.5  | 0.007 | Storage protein             |
| P00940 (20,35DAP)                                           | USP                                                                         | 2.0  | 0.041 | Storage protein             |
| P03007                                                      | GDSL-motif lipase/hydrolase                                                 | 6.4  | 0.039 | Oil body degradation        |
| P02120 (20,30DAP)                                           | GDSL-motif lipase/hydrolase                                                 | 3.8  | 0.008 | Oil body degradation        |
| <b>DISEASE &amp; STRESS TOLERANCE (20)</b>                  |                                                                             |      |       |                             |
| P03234 (20DAP)                                              | Alcohol dehydrogenase class III                                             | 6.1  | 0.013 | Alcohol dehydrogenase       |
| P02489 (30,35DAP)                                           | Alcohol dehydrogenase                                                       | 4.7  | 0.001 | Alcohol dehydrogenase       |
| P03051 (30,35DAP)                                           | Alcohol dehydrogenase                                                       | 3.9  | 0.001 | Alcohol dehydrogenase       |
| P03230 (30DAP)                                              | Alcohol dehydrogenase                                                       | 3.8  | 0.001 | Alcohol dehydrogenase       |
| P02861 (30DAP)                                              | Alcohol dehydrogenase                                                       | 2.1  | 0.013 | Alcohol dehydrogenase       |
| P02104                                                      | Alcohol dehydrogenase                                                       | 2.1  | 0.006 | Alcohol dehydrogenase       |
| P00931                                                      | (Benzo)quinone oxidoreductase                                               | 2.1  | 0.017 | ROS response                |
| P04797                                                      | Superoxide dismutase                                                        | 13.2 | 0.018 | Detoxification              |
| P01659                                                      | Glutathione reductase (NADH)                                                | 8.8  | 0.005 | Detoxification              |
| P02406                                                      | Glutathione S-transferase                                                   | 2.0  | 0.008 | Detoxification              |
| P03755 (30,35DAP)                                           | Phospholipid hydroperoxide glutathione peroxidase                           | 4.2  | 0.008 | Detoxification              |
| P03812                                                      | Peroxioredoxin Q                                                            | 2.1  | 0.031 | Detoxification              |
| P04171 (30,35DAP)                                           | Metallothionein-like protein 1 (MT-1)                                       | 2.1  | 0.006 | Detoxification              |
| P00886                                                      | Dehydration-responsive protein RD22                                         | 2.2  | 0.009 | Drought response            |
| P02655 (20DAP)                                              | Dehydration-responsive protein RD22                                         | 2.0  | 0.043 | Drought response            |
| P04232                                                      | LEA protein                                                                 | 2.0  | 0.003 | Drought response            |
| P02378                                                      | LEA protein                                                                 | 5.4  | 0.049 | Drought response            |
| P00798                                                      | Pathogenesis-related protein STH-21                                         | 7.6  | 0.015 | Defense                     |
| P04050                                                      | Wound-inducible basic protein                                               | 6.6  | 0.044 | Defense                     |
| P02161                                                      | Class IV chitinase                                                          | 4.0  | 0.001 | Defense                     |
| P01206 (30,35DAP)                                           | Syntaxin-132 (AtSYP132)                                                     | 2.5  | 0.004 | Vesicle trafficking         |
| <b>SIGNALING &amp; Hormone functions (20)</b>               |                                                                             |      |       |                             |
| P02122 (20,30DAP)                                           | MYB-112/50 TF, Tuber-specific and sucrose-responsive element binding factor | 2.6  | 0.003 | Transcription factor        |
| P01965                                                      | Ser/Thr-protein kinase SAPK7, Osmotic stress/ABA-activated protein kinase 7 | 3.9  | 0.035 | Protein phosphorylation     |
| P00558                                                      | Phosphatidylinositol 3-kinase                                               | 3.5  | 0.001 | Inositol metabolism         |
| P01051                                                      | Defender against cell death 1 (DAD-1)                                       | 3.3  | 0.039 | Defender against cell death |
| P04412                                                      | Phosphatidylethanolamine binding protein FT / TF1                           | 3.0  | 0.009 | Signaling                   |
| P01377                                                      | Leucine-rich repeat receptor protein kinase EXS                             | 2.6  | 0.009 | Protein phosphorylation     |
| P01224                                                      | Receptor protein kinase TMK1                                                | 2.4  | 0.019 | Protein phosphorylation     |
| P00642                                                      | Protein kinase                                                              | 2.2  | 0.007 | Protein phosphorylation     |
| P02753                                                      | Protein-Tyrosine-phosphatase                                                | 2.1  | 0.024 | Protein phosphorylation     |
| P01656 (30DAP)                                              | Auxin-responsive protein IAA8                                               | 7.1  | 0.001 | Auxin function repression   |
| P04475                                                      | Gibberellin regulated protein (GAST1)                                       | 2.3  | 0.011 | GA functions                |
| P04716 (20DAP)                                              | S-adenosyl-L- methionine:jasmonic acid carboxyl methyltransferase           | 2.9  | 0.013 | JA synthesis                |
| P00392                                                      | Allene oxide cyclase 4, chloroplast                                         | 2.0  | 0.012 | JA synthesis                |
| P04233 (30,35DAP)                                           | 12-oxophytodienoic acid 10, 11-reductase, OPR2                              | 2.0  | 0.007 | JA biosynthesis             |
| P01268 (20,35DAP)                                           | EMB2737 (EMBRYO DEFECTIVE 2737)                                             | 2.3  | 0.016 | Embryogenesis               |
| P01782                                                      | Ethylene-induced calmodulin-binding protein, transcriptional activator      | 2.1  | 0.039 | Ca-signaling                |
| P02191                                                      | Calmodulin 7                                                                | 2.2  | 0.021 | Ca-signaling                |
| P02259 (30,35DAP)                                           | Homeobox protein                                                            | 4.7  | 0.012 | Homeotic functions          |
| P01367 (20DAP)                                              | Argonaute 1                                                                 | 4.8  | 0.029 | Homeotic functions          |
| P02862                                                      | Argonaute 1                                                                 | 2.5  | 0.024 | Homeotic functions          |
| <b>PHOTOSYNTHESIS (9)</b>                                   |                                                                             |      |       |                             |
| P00436                                                      | PS I assembly protein                                                       | 2.4  | 0.023 | Photosynthesis              |
| P01196                                                      | PS I assembly protein                                                       | 2.1  | 0.010 | Photosynthesis              |
| P01410 (20DAP)                                              | PS I reaction center subunit V                                              | 2.1  | 0.038 | Photosynthesis              |
| P00009 (30DAP)                                              | PS II D1, reaction center                                                   | 3.1  | 0.000 | Photosynthesis              |
| P01038 (30DAP)                                              | PS II reaction center protein I (PSII-I)                                    | 4.9  | 0.044 | Photosynthesis              |
| P02826                                                      | PS II oxygen-evolving complex protein 1                                     | 2.1  | 0.001 | Photosynthesis              |
| P02155                                                      | Phytol kinase 1, chloroplast                                                | 22.7 | 0.001 | Chlorophyll degradation     |
| P02149 (20DAP)                                              | Red chlorophyll catabolite reductase, chloroplast                           | 2.9  | 0.023 | Chlorophyll degradation     |
| P00854 (30DAP)                                              | CAB-8                                                                       | 2.2  | 0.002 | Chlorophyll binding protein |
| <b>TRANSCRIPTION &amp; TRANSLATION &amp; HISTONES (116)</b> |                                                                             |      |       |                             |
| P00844                                                      | Elongation factor EF-2                                                      | 6.2  | 0.001 | Translation                 |
| P01177                                                      | Elongation factor 1-alpha (EF-1-alpha)                                      | 2.3  | 0.001 | Translation                 |
| P02494                                                      | Translation initiation factor 3g                                            | 6.0  | 0.007 | Translation                 |
| P01643                                                      | Translation initiation factor (eIF-3 zeta)                                  | 7.6  | 0.000 | Translation                 |
| P03971                                                      | Translation initiation factor 5A-2                                          | 2.2  | 0.041 | Translation                 |
| P01474                                                      | Elongation factor 1-alpha (EF-1-alpha)                                      | 3.3  | 0.000 | Translation                 |
| P02752                                                      | Elongation factor 1A                                                        | 2.4  | 0.007 | Translation                 |
| P01147 (35DAP)                                              | Transducin family protein / WD-40 repeat                                    | 2.3  | 0.004 | Pre-mRNA splicing           |
| P00528                                                      | RNA polymerase beta subunit                                                 | 3.6  | 0.015 | Transcription               |
| P00457 (30DAP)                                              | DNA-directed RNA polymerase                                                 | 2.0  | 0.017 | Transcription               |
| P01638                                                      | DEAD-box ATP-dependent RNA helicase                                         | 2.4  | 0.032 | Transcription               |
| P00629                                                      | DEAD box RNA helicase                                                       | 2.3  | 0.007 | Transcription               |
| P03994                                                      | Glutamyl-tRNA(Gln) amidotransferase                                         | 4.0  | 0.001 | Translation                 |
| P02221 (30DAP)                                              | WD repeat protein pop3                                                      | 2.0  | 0.013 | mRNA processing             |
| P02953                                                      | 40S ribosomal protein S17                                                   | 4.7  | 0.002 | Ribosomal protein           |

|                |                                      |       |       |                   |
|----------------|--------------------------------------|-------|-------|-------------------|
| P01384         | Ribosomal protein L28                | 121.9 | 0.000 | Ribosomal protein |
| P01380         | 40S ribosomal protein S25            | 26.3  | 0.010 | Ribosomal protein |
| P01182         | Ribosomal protein L27                | 21.7  | 0.009 | Ribosomal protein |
| P01994         | Ribosomal protein S10, plastid.      | 20.7  | 0.003 | Ribosomal protein |
| P02048         | 60S RIBOSOMAL PROTEIN                | 8.9   | 0.001 | Ribosomal protein |
| P01362         | 60S ribosomal protein L12            | 7.4   | 0.006 | Ribosomal protein |
| P02342         | Ribosomal protein L8, cytosolic      | 6.8   | 0.012 | Ribosomal protein |
| P01388         | Ribosomal protein L36                | 6.3   | 0.028 | Ribosomal protein |
| P00006         | 60S ribosomal protein L38            | 5.7   | 0.007 | Ribosomal protein |
| P04732         | 40S ribosomal protein S4             | 4.9   | 0.047 | Ribosomal protein |
| P04411         | 40S ribosomal protein S19-3          | 4.3   | 0.021 | Ribosomal protein |
| P02097         | 60S ribosomal protein L21            | 4.2   | 0.003 | Ribosomal protein |
| P04287         | 60S ribosomal protein L5             | 4.1   | 0.001 | Ribosomal protein |
| P02076         | 60S ribosomal protein                | 4.0   | 0.049 | Ribosomal protein |
| P04372         | 40S ribosomal protein                | 3.7   | 0.050 | Ribosomal protein |
| P02286         | 40S ribosomal protein S24            | 3.6   | 0.010 | Ribosomal protein |
| P04958         | Acidic ribosomal protein P0          | 3.6   | 0.020 | Ribosomal protein |
| P02854         | Pyruvate dehydrogenase complex E3    | 3.5   | 0.001 | Ribosomal protein |
| P01485         | Ribosomal protein 27a                | 3.4   | 0.005 | Ribosomal protein |
| P03529         | 40S ribosomal protein S7             | 3.4   | 0.001 | Ribosomal protein |
| P04044         | 60S ribosomal protein L6_1,00E-87... | 3.3   | 0.005 | Ribosomal protein |
| P02275         | Ribosomal protein S25                | 3.1   | 0.018 | Ribosomal protein |
| P01317         | 40S ribosomal protein S16            | 2.9   | 0.006 | Ribosomal protein |
| P02780         | Ribosomal protein L33                | 2.9   | 0.006 | Ribosomal protein |
| P04304         | 40S ribosomal protein                | 2.8   | 0.004 | Ribosomal protein |
| P03475         | 40S ribosomal protein S30            | 2.8   | 0.014 | Ribosomal protein |
| P03094         | Ribosomal protein L28                | 2.7   | 0.041 | Ribosomal protein |
| P04290         | 60S ribosomal protein L21            | 2.7   | 0.004 | Ribosomal protein |
| P02984         | 60S ribosomal protein                | 2.7   | 0.005 | Ribosomal protein |
| P04542         | Ribosomal protein L18a               | 2.6   | 0.019 | Ribosomal protein |
| P02959         | 60S ribosomal protein L19            | 2.6   | 0.007 | Ribosomal protein |
| P05074         | Acidic ribosomal protein P0          | 2.6   | 0.002 | Ribosomal protein |
| P01797         | 60S ribosomal protein L21            | 2.5   | 0.014 | Ribosomal protein |
| P04219         | 40S ribosomal protein S10            | 2.5   | 0.019 | Ribosomal protein |
| P02139         | Ribosomal protein L23                | 2.5   | 0.032 | Ribosomal protein |
| P01752         | 60S ribosomal protein L15            | 2.4   | 0.012 | Ribosomal protein |
| P04399         | Ribosomal protein L9                 | 2.4   | 0.002 | Ribosomal protein |
| P04243         | 60S ribosomal protein L24            | 2.4   | 0.037 | Ribosomal protein |
| P04553         | Ribosomal protein S3a                | 2.4   | 0.004 | Ribosomal protein |
| P04495         | 60S ribosomal protein L13a           | 2.3   | 0.039 | Ribosomal protein |
| P03749         | 40S ribosomal protein S6             | 2.3   | 0.041 | Ribosomal protein |
| P02072         | 60S acidic ribosomal protein P1      | 2.2   | 0.005 | Ribosomal protein |
| P04216         | 60S ribosomal protein L10A           | 2.2   | 0.024 | Ribosomal protein |
| P04901         | Ribosomal protein S3a                | 2.2   | 0.013 | Ribosomal protein |
| P02326         | 60S ribosomal protein L7             | 2.2   | 0.017 | Ribosomal protein |
| P04476         | 40S ribosomal protein S6             | 2.2   | 0.001 | Ribosomal protein |
| P01202         | 40S ribosomal protein S30            | 2.1   | 0.000 | Ribosomal protein |
| P01035         | S28 ribosomal protein                | 2.1   | 0.028 | Ribosomal protein |
| P04204         | Ribosomal protein L9, cytosolic      | 2.1   | 0.004 | Ribosomal protein |
| P04103         | 60S RIBOSOMAL PROTEIN L36            | 2.1   | 0.020 | Ribosomal protein |
| P03107         | Ribosomal protein GL41               | 2.0   | 0.024 | Ribosomal protein |
| P04702         | Ribosomal protein L27                | 2.0   | 0.042 | Ribosomal protein |
| P00262         | 40S ribosomal protein SA             | 2.0   | 0.048 | Ribosomal protein |
| P04391         | 40S ribosomal protein SA             | 2.0   | 0.004 | Ribosomal protein |
| P01594         | Nuclear ribonucleoprotein            | 2.2   | 0.006 | Ribosomal protein |
| P04279         | Small nuclear ribonucleoprotein      | 4.0   | 0.026 | Ribosomal protein |
| P01473         | Small nuclear ribonucleoprotein U2B  | 2.2   | 0.003 | Ribosomal protein |
| P02078         | Ribonucleoprotein                    | 2.1   | 0.004 | Ribosomal protein |
| P01325 (30DAP) | Poly A binding protein               | 26.6  | 0.030 | mRNA processing   |
| P01839         | RNA-binding protein                  | 2.0   | 0.022 | mRNA processing   |
| P01229         | Histone deacetylase                  | 2.2   | 0.018 | Histone           |
| P01501         | Histone H4                           | 12.7  | 0.036 | Histone           |
| P01983         | Histone H3                           | 12.1  | 0.002 | Histone           |
| P01207         | Histone H4                           | 14.2  | 0.002 | Histone           |
| P01246         | Histone H4                           | 13.7  | 0.003 | Histone           |
| P01909         | Histone H2B1                         | 10.0  | 0.022 | Histone           |
| P01476         | Histone H4                           | 10.0  | 0.000 | Histone           |
| P01951         | Histone H4                           | 9.7   | 0.018 | Histone           |
| P02173         | Histone H2B1                         | 8.6   | 0.001 | Histone           |
| P02006         | Histone H2A                          | 8.3   | 0.031 | Histone           |
| P01955         | Histone H4                           | 7.2   | 0.001 | Histone           |
| P01115         | Histone H4                           | 6.8   | 0.001 | Histone           |
| P01127         | Histone H4                           | 6.1   | 0.049 | Histone           |
| P04482         | Histone H4                           | 5.1   | 0.001 | Histone           |
| P01927         | Histone H3                           | 4.5   | 0.048 | Histone           |
| P02404         | Histone H1                           | 4.4   | 0.020 | Histone           |
| P03703         | Histone H2B                          | 4.0   | 0.001 | Histone           |
| P02532         | Histone H4                           | 4.0   | 0.001 | Histone           |
| P04195         | Histone H3                           | 3.8   | 0.042 | Histone           |
| P04068         | Histone H2B                          | 3.8   | 0.039 | Histone           |
| P04869         | Histone H2B1                         | 3.6   | 0.035 | Histone           |
| P04684         | Histone H2A                          | 3.5   | 0.005 | Histone           |
| P04858         | Histone H2B1                         | 3.0   | 0.002 | Histone           |
| P00999         | Histone H2B                          | 2.9   | 0.001 | Histone           |
| P03596         | Histone H2B                          | 2.8   | 0.021 | Histone           |
| P01222         | Histone H3                           | 2.5   | 0.013 | Histone           |
| P00150         | Histone H3                           | 2.7   | 0.002 | Histone           |
| P04335         | Histone H4                           | 2.6   | 0.025 | Histone           |
| P04375         | Histone H1B                          | 2.6   | 0.002 | Histone           |
| P02616         | Histone H3                           | 2.4   | 0.001 | Histone           |
| P02318         | Histone H1                           | 2.4   | 0.040 | Histone           |
| P04748         | Histone H3                           | 2.3   | 0.047 | Histone           |
| P02323         | Histone H1                           | 2.3   | 0.028 | Histone           |

|        |              |     |       |         |
|--------|--------------|-----|-------|---------|
| P02138 | Histone H2A  | 2.2 | 0.026 | Histone |
| P04383 | Histone H3   | 2.1 | 0.002 | Histone |
| P01318 | Histone H3   | 2.1 | 0.005 | Histone |
| P03987 | Histone H2A  | 2.1 | 0.000 | Histone |
| P01368 | Histone H2B1 | 2.0 | 0.032 | Histone |
| P04426 | Histone H2B  | 2.1 | 0.008 | Histone |
| P04584 | Histone H4   | 2.1 | 0.005 | Histone |
| P03343 | Histone H2A  | 2.1 | 0.003 | Histone |

#### Upregulated, no annotation (122)

#### 25 DAP down (102)

| Seq. ID                                        | Gene Annotation                                      | Factor | P     | Function                        |
|------------------------------------------------|------------------------------------------------------|--------|-------|---------------------------------|
| <b>PRIMARY &amp; SECONDARY METABOLISM (26)</b> |                                                      |        |       |                                 |
| PCPS17 (35DAP)                                 | Sucrose synthase isoform 3                           | 2.5    | 0.012 | Sucrose metabolism              |
| PCPS21                                         | Vacuolar acid invertase Psl-1                        | 2.2    | 0.012 | Sucrose metabolism              |
| P05180                                         | Neutral invertase                                    | 2.8    | 0.034 | Sucrose metabolism              |
| P03795                                         | Phosphoglycerate mutase, cytosol                     | 2.2    | 0.013 | Glycolysis                      |
| P03767 (30DAP)                                 | Pyruvate kinase, chloroplast                         | 2.0    | 0.010 | Glycolysis                      |
| P04337                                         | 6-phosphogluconate dehydrogenase, plastid            | 2.1    | 0.002 | Pentose-P cycle                 |
| P04162 (20DAP)                                 | ADP-glucose pyrophosphorylase, small su              | 6.0    | 0.032 | Starch metabolism               |
| P05197                                         | ADP-glucose pyrophosphorylase, small su              | 4.8    | 0.001 | Starch metabolism               |
| P00655                                         | ADP-glucose pyrophosphorylase, small su              | 2.1    | 0.011 | Starch metabolism               |
| PCPS09                                         | ADP-glucose pyrophosphorylase, large su              | 2.0    | 0.004 | Starch metabolism               |
| P04791                                         | Beta-amylase, plastidial                             | 2.0    | 0.014 | Starch metabolism               |
| P00615                                         | UDP-glucose 4-epimerase                              | 2.0    | 0.004 | UDP-Glc/UDP-Gal interconversion |
| P00535                                         | UDP-glucose 4-epimerase                              | 2.8    | 0.036 | UDP-Glc/UDP-Gal interconversion |
| P04822 (30DAP)                                 | Galactinol synthase                                  | 4.7    | 0.002 | Raffinose sugar metabolism      |
| P01058 (30,35DAP)                              | Adenosine deaminase                                  | 2.5    | 0.023 | Purine metabolism               |
| P04879 (35DAP)                                 | S-adenosylmethionine synthetase                      | 2.2    | 0.004 | Methylation cycle               |
| P03766 (30DAP)                                 | S-adenosylmethionine decarboxylase                   | 2.1    | 0.010 | Methylation cycle               |
| P04479                                         | Iron/ascorbate family oxidoreductases, cytosol       | 2.2    | 0.023 | Oxidoreductase                  |
| P03631 (30,35DAP)                              | UDP-glucuronosyl/UDP-glucosyltransferase             | 3.2    | 0.016 | CK homeostasis                  |
| P05041                                         | Isoflavone oxidoreductase                            | 2.2    | 0.031 | Oxidoreductase                  |
| P03951 (30DAP)                                 | Inorganic pyrophosphatase                            | 2.2    | 0.016 | Pyrophosphatase                 |
| P03480 (30DAP)                                 | Cytochrome c oxidase                                 | 2.2    | 0.002 | Oxidase                         |
| P00518 (35DAP)                                 | Glutamine synthetase, GS1, cytosolic                 | 2.1    | 0.014 | Amino acid metabolism           |
| P04838 (35DAP)                                 | Extradiol ring-cleavage dioxygenase                  | 2.1    | 0.029 | Dioxygenase                     |
| P01154 (30DAP)                                 | Phosphatidylinositol-glycan biosynthesis class C, ER | 2.3    | 0.006 | Glycolipid synthesis            |
| P03786 (30,35DAP)                              | Alkaline phytoceramidase                             | 2.6    | 0.006 | FA metabolism                   |

#### TRANSPORT (10)

|                   |                                            |     |       |                                   |
|-------------------|--------------------------------------------|-----|-------|-----------------------------------|
| P01543            | Glucose transporter, plastid               | 2.8 | 0.007 | Plastid sugar transport           |
| P00852 (30DAP)    | OEP16.1, amino acid selective channel      | 5.6 | 0.008 | Plastidial outer membrane protein |
| P01176 (20DAP)    | OEP16.2, amino acid selective channel      | 2.0 | 0.001 | Plastidial outer membrane protein |
| P01612            | Tic32, 3-ketoacyl-CoA synthase, SDR family | 2.5 | 0.022 | Chloroplast translocator          |
| P02762 (30DAP)    | Zinc transporter                           | 2.5 | 0.032 | Metal transport                   |
| P03782 (35DAP)    | K+ channel beta chain                      | 2.5 | 0.008 | K+ transport                      |
| P01893            | Chloride channel protein CLC-d             | 2.4 | 0.010 | CH metabolism                     |
| P03613            | Nitrate/chlorate transporter, related      | 2.1 | 0.008 | Nitrate transport                 |
| P04444 (30DAP)    | Ca-ATPase, IIB (ER)                        | 2.4 | 0.002 | Ca transport                      |
| P04982 (30,35DAP) | Aquaporin, PIP-type 7a, turgor-responsive  | 2.0 | 0.047 | Water transport                   |

#### ENDOMEMBRANE TRANSPORT & PROTEIN PROCESSING (12)

|                   |                                              |     |       |                            |
|-------------------|----------------------------------------------|-----|-------|----------------------------|
| P03208 (20DAP)    | Legumain                                     | 2.4 | 0.020 | Storage protein processing |
| P04764 (30,35DAP) | DnaK-type molecular chaperone HSC71.0        | 2.2 | 0.011 | Chaperone                  |
| P04986            | Chaperone multifunctional (14-3-3 family)    | 2.2 | 0.004 | Chaperone                  |
| P03093            | Coated vesicle membrane protein              | 2.1 | 0.002 | Vesicle trafficking        |
| P02510 (30DAP)    | Alpha-soluble NSF attachment protein         | 2.0 | 0.019 | Vesicle trafficking        |
| P05117            | Signal recognition particle receptor         | 2.1 | 0.007 | Vesicle trafficking        |
| P04914 (30DAP)    | Beta-Ig-H3/fasciclin                         | 2.0 | 0.009 | Vesicle trafficking        |
| P05035 (35DAP)    | Microtubule-associated protein               | 2.9 | 0.001 | Vesicle trafficking        |
| P05151            | ADP-ribosylation factor GTP binding protein) | 2.5 | 0.006 | Vesicle transport          |
| P04309            | ADP-ribosylation factor GTP binding protein) | 2.1 | 0.022 | Vesicle transport          |
| P00059 (30,35DAP) | Peptidyl-prolyl cis-trans isomerase          | 3.0 | 0.003 | Protein processing         |
| P05208 (30DAP)    | Peptidyl-prolyl cis-trans isomerase          | 2.3 | 0.007 | Protein processing         |

#### REGULATED PROTEIN DEGRADATION (12)

|                   |                                            |     |       |                                        |
|-------------------|--------------------------------------------|-----|-------|----------------------------------------|
| P02453 (20,30DAP) | Serine carboxypeptidase 1                  | 3.0 | 0.020 | Proteinase                             |
| P02708 (30,35DAP) | Prolyl Oligopeptidase                      | 2.6 | 0.032 | Proteinase                             |
| P01932 (30,35DAP) | Ubiquitin-protein ligase/ zinc ion binding | 2.5 | 0.049 | Ubiquitin mediated protein degradation |
| P02115            | Aspartic protease                          | 2.1 | 0.048 | Proteinase                             |
| P03124            | 20S core proteasome subunit alpha 2        | 2.0 | 0.049 | Ubiquitin mediated protein degradation |
| P03922            | Prolyl Oligopeptidase                      | 2.0 | 0.001 | Proteinase                             |
| P02732            | 26S proteasome regulatory subunit          | 1.9 | 0.003 | Ubiquitin mediated protein degradation |
| P01451            | Cullin 3B                                  | 2.3 | 0.040 | Ubiquitin mediated protein degradation |
| P03356 (30DAP)    | Ubiquitin                                  | 2.0 | 0.006 | Ubiquitin mediated protein degradation |
| P04941 (20DAP)    | 26S proteasome regulatory subunit S5A      | 2.1 | 0.008 | Ubiquitin mediated protein degradation |
| P00331            | Subtilisin-like proteinase                 | 2.4 | 0.002 | Proteinase                             |
| P03243 (30,35DAP) | Ubiquitin-conjugating enzyme E2            | 3.0 | 0.007 | Ubiquitin mediated protein degradation |

#### CELL PROLIFERATION (2)

|                |                                       |     |       |                      |
|----------------|---------------------------------------|-----|-------|----------------------|
| P05130 (20DAP) | Beta tubulin                          | 2.1 | 0.013 | Cell proliferation   |
| P04715 (20DAP) | Beta-xylosidase/alpha-L-arabinosidase | 2.1 | 0.011 | Cell wall metabolism |

#### STORAGE RELATED (10)

|                   |                  |      |       |                 |
|-------------------|------------------|------|-------|-----------------|
| P04995            | Legumin K        | 2.7  | 0.001 | Storage protein |
| P04997 (20DAP)    | Legumin B        | 2.0  | 0.001 | Storage protein |
| P02001 (20DAP)    | Legumin B        | 2.1  | 0.009 | Storage protein |
| P04448 (20,30DAP) | Legumin A2       | 2.8  | 0.000 | Storage protein |
| P04535 (20,30DAP) | Albumin          | 6.7  | 0.001 | Storage protein |
| P04441 (20,30DAP) | Albumin 2        | 5.9  | 0.021 | Storage protein |
| P04532 (20,30DAP) | Glycinin subunit | 12.6 | 0.000 | Storage protein |
| P04214            | 15.8 kDa oleosin | 3.4  | 0.038 | Lipid storage   |
| P04150 (20DAP)    | Oleosin          | 2.7  | 0.000 | Lipid storage   |
| P03997            | LEA protein      | 2.6  | 0.001 | LEA protein     |

#### DISEASE & STRESS TOLERANCE (8)

|        |                                           |     |       |                   |
|--------|-------------------------------------------|-----|-------|-------------------|
| P04644 | Disease resistance response protein 206-d | 6.4 | 0.030 | Pathogen response |
|--------|-------------------------------------------|-----|-------|-------------------|

|                                                           |                                                    |      |       |                                       |
|-----------------------------------------------------------|----------------------------------------------------|------|-------|---------------------------------------|
| P01681                                                    | Senescence-associated protein (din1)               | 2.2  | 0.002 | Stress response                       |
| P00638 (30,35DAP)                                         | Trypsin/chymotrypsin inhibitor                     | 4.7  | 0.018 | Pathogen response                     |
| P00404 (20DAP)                                            | Leguminous Kunitz-type inhibitor                   | 2.2  | 0.010 | Pathogen response                     |
| P00971                                                    | Peroxidase                                         | 2.4  | 0.013 | Detoxification                        |
| P04867 (35DAP)                                            | Superoxide dismutase                               | 2.2  | 0.011 | Detoxification                        |
| P04250 (30,35DAP)                                         | Pathogenesis-related protein 17                    | 2.0  | 0.015 | Pathogen response                     |
| P00685                                                    | Flavin-containing monooxygenase FMO                | 2.5  | 0.004 | Pathogen response                     |
| <b>SIGNALING &amp; HORMONE FUNCTIONS (13)</b>             |                                                    |      |       |                                       |
| P02114 (35DAP)                                            | Two-component response regulator ARR5              | 10.6 | 0.045 | CK functions                          |
| P05015 (20DAP)                                            | Short-chain dehydrogenases/reductases (tasselseed) | 2.9  | 0.039 | Short-chain dehydrogenases/reductases |
| P04580                                                    | Short chain dehydrogenase                          | 2.3  | 0.011 | Short-chain dehydrogenases/reductases |
| P05158 (20DAP)                                            | Cytochrome P450 (CYP71B2)                          | 2.4  | 0.012 | Oxygenase Cyp                         |
| P03467 (20DAP)                                            | Indole-3-acetic acid-amido synthetase              | 2.0  | 0.014 | Auxin degradation                     |
| P03111                                                    | Serine/Threonine protein kinase                    | 2.7  | 0.003 | Protein kinase                        |
| P05048 (30DAP)                                            | Phytochrome B                                      | 2.6  | 0.005 | Signaling                             |
| P00932                                                    | Thioredoxin                                        | 2.3  | 0.037 | Redox regulation                      |
| P03792 (30DAP)                                            | Thioredoxin h                                      | 2.2  | 0.011 | Redox regulation                      |
| P04464 (20,30DAP)                                         | Ferredoxin                                         | 2.2  | 0.019 | Redox regulation                      |
| P04812                                                    | GRAS family transcription factor / DELLA/ /GAI     | 2.2  | 0.005 | Repressor of GA functions             |
| PCPS25                                                    | Stamina pistilloidia                               | 2.2  | 0.003 | Development                           |
| PCPS24 (20DAP)                                            | UNIFOLIATA protein, TF                             | 2.1  | 0.005 | Development                           |
| <b>PHOTOSYTHESIS (7)</b>                                  |                                                    |      |       |                                       |
| P04559 (35DAP)                                            | PS II protein PsbX                                 | 2.4  | 0.016 | Photosynthesis                        |
| P00462                                                    | PS II 22K protein                                  | 2.2  | 0.022 | Photosynthesis                        |
| P04462 (20,30DAP)                                         | PS II subunit (22kDa)                              | 2.1  | 0.005 | Photosynthesis                        |
| P05030                                                    | PS II manganese-binding protein PsbY               | 2.1  | 0.001 | Photosynthesis                        |
| P05083                                                    | Rubisco, small su                                  | 3.1  | 0.003 | Photosynthesis                        |
| P04369                                                    | Rubisco, small su                                  | 2.2  | 0.035 | Photosynthesis                        |
| P04368 (20,30DAP)                                         | Rubisco, small su                                  | 2.1  | 0.042 | Photosynthesis                        |
| <b>TRANSCRIPTION &amp; TRANSLATION &amp; HISTONES (2)</b> |                                                    |      |       |                                       |
| P05129                                                    | Ribosomal protein L12, chloroplast                 | 2.2  | 0.001 | Ribosomal protein                     |
| P04897                                                    | Histone H2B                                        | 2.2  | 0.008 | Histone                               |
| <b>Downregulated, no annotation (72)</b>                  |                                                    |      |       |                                       |

| 30 DAP up (201)                                                |                                                                           |        |       |                                        |
|----------------------------------------------------------------|---------------------------------------------------------------------------|--------|-------|----------------------------------------|
| Seq. ID                                                        | Gene Annotation                                                           | Factor | P     | Function                               |
| <b>PRIMARY &amp; SECONDARY METABOLISM &amp; TRANSPORT (39)</b> |                                                                           |        |       |                                        |
| P00898 (20,35DAP)                                              | Sucrose-phosphate synthase                                                | 3.2    | 0.012 | Sucrose metabolism                     |
| P02459 (25,35DAP)                                              | Glyceraldehyde-3-phosphate DH, cytosolic                                  | 4.7    | 0.040 | Glycolysis                             |
| P02370 (25DAP)                                                 | Glucose-6-phosphate isomerase, cytosolic                                  | 2.1    | 0.021 | Glycolysis                             |
| P03836                                                         | Phosphoglucosmutase, chloroplast                                          | 2.0    | 0.020 | Glycolysis                             |
| P01841 (35DAP)                                                 | Pyruvate dehydrogenase E1, beta subunit                                   | 2.3    | 0.003 | Glycolysis                             |
| P02739                                                         | Pyruvate dehydrogenase E1, beta subunit                                   | 2.0    | 0.010 | Glycolysis                             |
| P01841 (35DAP)                                                 | UDP-glucose pyrophosphorylase                                             | 2.1    | 0.003 | CH metabolism                          |
| P01521 (20DAP)                                                 | GDP-mannose 3,5-epimerase 2                                               | 9.3    | 0.034 | CH metabolism                          |
| P04677 (20DAP)                                                 | Invertase/pectin methylesterase inhibitor                                 | 4.9    | 0.008 | CH metabolism                          |
| P03466 (20,35DAP)                                              | Glycoside hydrolase                                                       | 8.8    | 0.001 | CH metabolism                          |
| P02670 (35DAP)                                                 | Beta3-glucuronyltransferase                                               | 2.9    | 0.044 | CH metabolism                          |
| P01976 (25,35DAP)                                              | Starch phosphorylase, L chloroplast                                       | 7.5    | 0.003 | Starch metabolism                      |
| P02446                                                         | Starch debranching enzyme, isoform 2                                      | 3.2    | 0.013 | Starch metabolism                      |
| P04817                                                         | NADP-dependent oxidoreductase P1 (ADH-superfamily)                        | 3.6    | 0.016 | NADH oxidation                         |
| P02915 (20DAP)                                                 | NADH dehydrogenase (ubiquinone), mitochondrial, complex 1 75 kDa          | 2.4    | 0.016 | NADH oxidation                         |
| P02505 (25DAP)                                                 | Ketol-acid reductoisomerase, chloroplast                                  | 4.7    | 0.012 | Leu/Val/Ile biosynthesis               |
| P04292 (25DAP)                                                 | Argininosuccinate synthase, chloroplast                                   | 2.8    | 0.006 | Arg biosynthesis                       |
| P01261 (25DAP)                                                 | Argininosuccinate synthase, chloroplast                                   | 2.7    | 0.008 | Arg biosynthesis                       |
| P04298 (25DAP)                                                 | 5'-adenylylsulfate reductase 1, chloroplast                               | 2.3    | 0.030 | Cys biosynthesis                       |
| P02064 (25DAP)                                                 | O-acetylserine (Thiol)-lyase (Cys synthase), plastid                      | 5.9    | 0.009 | Cys biosynthesis                       |
| P00936 (20,25DAP)                                              | Methionine synthase                                                       | 2.4    | 0.007 | Met biosynthesis                       |
| P01003                                                         | Methionine synthase                                                       | 2.3    | 0.000 | Met biosynthesis                       |
| P03804                                                         | Phosphoserine phosphatase, chloroplast                                    | 2.1    | 0.021 | Ser biosynthesis                       |
| P01351                                                         | Indole-3-glycerol phosphate synthase, chloroplast                         | 2.0    | 0.023 | Aromatic amino acid biosynthesis       |
| P02005                                                         | L-asparaginase                                                            | 2.1    | 0.042 | Amino acid metabolism                  |
| P02008                                                         | Fumarylacetoacetase                                                       | 2.5    | 0.020 | Phe/Tyr degradation                    |
| P00389                                                         | Flavonol synthase                                                         | 4.5    | 0.039 | Flavonoid biosynthesis                 |
| P04102                                                         | Riboflavin synthase                                                       | 3.6    | 0.016 | Riboflavin biosynthesis                |
| P01821 (35DAP)                                                 | Phytoene synthase (geranylgeranyl-diphosphate geranylgeranyl transferase) | 2.7    | 0.004 | Carotenoid synthesis                   |
| P00938 (25DAP)                                                 | 4-coumaroyl- CoA synthase 3                                               | 2.7    | 0.042 | Phenylpropanoid metabolism             |
| P01709                                                         | S-adenosylmethionine synthetase                                           | 12.0   | 0.035 | Methylation cycle                      |
| P01419 (20,35DAP)                                              | DNA (cytosine-5-)-methyltransferase                                       | 2.8    | 0.033 | Methyltransferase                      |
| P02413                                                         | O-diphenol-O-methyl transferase                                           | 2.0    | 0.028 | Methyltransferase                      |
| P01416 (25,35DAP)                                              | Adenylate kinase, (ATP- AMP transphosphorylase) chloroplast               | 2.1    | 0.020 | Nucleotide metabolism                  |
| P01847 (25,35DAP)                                              | Nudix hydrolase, nucleoside sugar hydratase                               | 2.8    | 0.011 | Nucleoside sugar catabolism            |
| P01648 (35DAP)                                                 | MGDG synthase type A                                                      | 2.6    | 0.022 | FA metabolism                          |
| P01436                                                         | Epoxide hydrolase                                                         | 5.2    | 0.031 | FA metabolism                          |
| P02042                                                         | Reversibly glycosylatable polypeptide                                     | 3.8    | 0.010 | Cell wall metabolism                   |
| P02328 (25DAP)                                                 | Reversibly glycosylatable polypeptide 1                                   | 4.6    | 0.020 | Cell wall metabolism                   |
| <b>TRANSPORT (6)</b>                                           |                                                                           |        |       |                                        |
| P02071 (20DAP)                                                 | Glc-6-phosphate/phosphate-translocator precursor, plastid                 | 4.4    | 0.034 | Glc-6-P transport                      |
| P00784 (25,35DAP)                                              | Peptide transporter PTR2                                                  | 7.4    | 0.043 | Peptide transport                      |
| P04485 (25,35DAP)                                              | ATP synthase delta chain, mitochondrial                                   | 5.1    | 0.015 | ATP synthesis                          |
| P02092 (25DAP)                                                 | P-type H+-ATPase, plasma membrane                                         | 2.8    | 0.003 | H+ transport                           |
| P00808                                                         | SecA-type chloroplast protein transport factor                            | 3.9    | 0.025 | Chloroplast translocation              |
| P02225 (25,35DAP)                                              | Uncoupling protein, mitochondrial                                         | 3.4    | 0.046 | Respiratory control                    |
| <b>ENDOMEMBRANE TRANSPORT &amp; PROTEIN PROCESSING (28)</b>    |                                                                           |        |       |                                        |
| P01677 (25DAP)                                                 | GTP-binding protein ras1                                                  | 35.0   | 0.012 | Vesicle trafficking                    |
| P00676                                                         | G protein beta                                                            | 2.1    | 0.027 | Vesicle trafficking                    |
| P01121                                                         | Rab1                                                                      | 3.6    | 0.034 | Vesicle trafficking                    |
| P01988 (35DAP)                                                 | Ras-related protein Rab7D                                                 | 4.1    | 0.008 | Vesicle trafficking                    |
| P00689 (25,35DAP)                                              | Coatmer subunit gamma                                                     | 10.8   | 0.035 | Vesicle trafficking                    |
| P01526 (35DAP)                                                 | SNF7 protein                                                              | 6.3    | 0.024 | Vesicle trafficking                    |
| P02196                                                         | Clathrin assembly protein AP180                                           | 6.2    | 0.028 | Vesicle trafficking                    |
| P00386 (20,25DAP)                                              | Vesicle transport v-SNARE                                                 | 3.4    | 0.005 | Vesicle trafficking                    |
| P02445                                                         | TRF1-interacting ankyrin-related ADP-ribose polymerase                    | 2.1    | 0.011 | Vesicle trafficking                    |
| P03171                                                         | Harpin-induced protein                                                    | 2.8    | 0.020 | Vesicle trafficking                    |
| P02414                                                         | Heat shock protein DnaJ                                                   | 8.9    | 0.030 | Chaperone                              |
| P00619                                                         | Heat shock protein Hsp90                                                  | 2.7    | 0.036 | Chaperone                              |
| P00166 (20,25DAP)                                              | Chaperone PHSP1, mitochondrial                                            | 3.1    | 0.018 | Chaperone                              |
| P02333 (20,25,35DAP)                                           | Chaperonin 10, chloroplast                                                | 2.0    | 0.010 | Chaperone                              |
| P02055 (35DAP)                                                 | Chaperone HSP20-like                                                      | 2.3    | 0.003 | Chaperone                              |
| P02026                                                         | Chaperonin 20 kDa, chloroplast                                            | 2.2    | 0.011 | Chaperone                              |
| P03657 (25,35DAP)                                              | Chaperone (copper)                                                        | 2.3    | 0.004 | Chaperone                              |
| P02763 (20,25DAP)                                              | Chaperone multifunctional (14-3-3 family)                                 | 2.9    | 0.013 | Chaperone                              |
| P02258 (25,35DAP)                                              | Calreticulin                                                              | 11.3   | 0.034 | Ca-binding chaperone (ER)              |
| P04523 (25DAP)                                                 | Calreticulin                                                              | 3.1    | 0.024 | Ca-binding chaperone(ER)               |
| P02165 (35DAP)                                                 | Dolichyl-diphosphooligosaccharide-protein glycosyltransferase             | 2.0    | 0.008 | Protein processing                     |
| P02511                                                         | Signal peptide peptidase                                                  | 5.7    | 0.001 | Protein processing                     |
| P01573 (25,35DAP)                                              | Signal peptide peptidase                                                  | 2.5    | 0.012 | Protein processing                     |
| P01305                                                         | Signal recognition particle receptor beta subunit                         | 2.5    | 0.029 | Protein processing                     |
| P01338 (25DAP)                                                 | Mitochondrial-processing peptidase                                        | 3.0    | 0.007 | Protein processing                     |
| P04217 (25DAP)                                                 | Protein disulfide-isomerase                                               | 2.5    | 0.002 | Protein processing                     |
| P01763                                                         | ORMDL protein (protein folding in ER)                                     | 2.8    | 0.007 | Protein processing                     |
| P01279 (35DAP)                                                 | Peptidyl-prolyl cis- trans isomerase                                      | 3.1    | 0.028 | Protein processing                     |
| <b>REGULATED PROTEIN DEGRADATION (12)</b>                      |                                                                           |        |       |                                        |
| P02435 (20,25DAP)                                              | Ubiquitin                                                                 | 2.0    | 0.000 | Ubiquitin mediated protein degradation |
| P02386 (35DAP)                                                 | Ubiquitin fusion degradation protein UFD1                                 | 2.3    | 0.023 | Ubiquitin mediated protein degradation |
| P01932 (20,35DAP)                                              | Ubiquitin protein ligase                                                  | 2.2    | 0.031 | Ubiquitin mediated protein degradation |
| P03243                                                         | Ubiquitin-conjugating enzyme E2                                           | 2.0    | 0.012 | Ubiquitin mediated protein degradation |
| P00934                                                         | RING zinc finger protein, Ubiquitin conjugation                           | 16.6   | 0.001 | Ubiquitin mediated protein degradation |
| P02675                                                         | Serine carboxypeptidase                                                   | 76.4   | 0.004 | Proteinase                             |
| P02453 (20,25DAP)                                              | Serine carboxipeptidase 1                                                 | 2.0    | 0.004 | Proteinase                             |
| P02234 (20,25DAP)                                              | Leucine aminopeptidase                                                    | 28.0   | 0.003 | Proteinase                             |
| P04496 (25DAP)                                                 | Cysteine proteinase 15A, (Turgor-responsive protein 15A)                  | 2.2    | 0.033 | Proteinase                             |
| P01006 (20,25DAP)                                              | N-acyl-L-amino-acid amidohydrolase                                        | 2.1    | 0.000 | Peptidase                              |

|                                                          |                                                                             |       |       |                             |
|----------------------------------------------------------|-----------------------------------------------------------------------------|-------|-------|-----------------------------|
| P02708 (25,35DAP)                                        | Prolyl endopeptidase                                                        | 2.1   | 0.003 | Proteinase                  |
| P02142 (20DAP)                                           | Peptidase/protease (Insulin degrading enzyme)                               | 6.3   | 0.006 | Proteinase                  |
| <b>CELL PROLIFERATION (16)</b>                           |                                                                             |       |       |                             |
| P00153                                                   | Cyclin D3                                                                   | 3.9   | 0.001 | Cell proliferation          |
| P00657                                                   | Cyclin B                                                                    | 2.4   | 0.043 | Cell proliferation          |
| P04306 (25DAP)                                           | Annexin                                                                     | 8.1   | 0.005 | Cell proliferation          |
| P03116                                                   | Annexin                                                                     | 5.1   | 0.010 | Cell proliferation          |
| P00178 (25,35DAP)                                        | Annexin                                                                     | 2.7   | 0.000 | Cell proliferation          |
| P02931 (35DAP)                                           | Annexin                                                                     | 2.1   | 0.009 | Cell proliferation          |
| P02837 (35DAP)                                           | Tubulin alpha                                                               | 2.0   | 0.045 | Cell proliferation          |
| P04322 (25DAP)                                           | Tubulin beta                                                                | 2.0   | 0.009 | Cell proliferation          |
| P02170                                                   | Tubulin-specific chaperone C                                                | 4.5   | 0.046 | Cell proliferation          |
| P01817 (35DAP)                                           | Tubulin-specific chaperone A                                                | 2.2   | 0.006 | Cell proliferation          |
| P00843 (20DAP)                                           | Putative cell division control protein 48                                   | 2.8   | 0.005 | Cell proliferation          |
| P01910 (35DAP)                                           | Prohibitin                                                                  | 2.8   | 0.003 | Cell proliferation          |
| P02077                                                   | Ca(2+)-regulated actin-binding protein                                      | 2.5   | 0.027 | Cell proliferation          |
| P02536                                                   | Xyloglucan endotransglycosylase                                             | 17.4  | 0.013 | Cell wall metabolism        |
| P02774                                                   | Phosphatidylinositol N-acetylglucosaminyltransferase subunit P              | 2.0   | 0.036 | Cell wall metabolism        |
| P04435                                                   | BURP domain-containing protein / polygalacturonase                          | 3.9   | 0.046 | Cell wall metabolism        |
| <b>STORAGE RELATED (8)</b>                               |                                                                             |       |       |                             |
| P04038 (25,35DAP)                                        | Vicilin A                                                                   | 10.8  | 0.000 | Storage protein             |
| P04635 (35DAP)                                           | Vicilin                                                                     | 3.8   | 0.000 | Storage protein             |
| P02195 (20,25DAP)                                        | Vicilin                                                                     | 2.2   | 0.006 | Storage protein             |
| P00635 (35DAP)                                           | USP                                                                         | 8.9   | 0.000 | Storage protein             |
| P01844 (20,35DAP)                                        | USP                                                                         | 3.1   | 0.027 | Storage protein             |
| P01146 (35DAP)                                           | USP                                                                         | 2.0   | 0.004 | Storage protein             |
| P01245 (20DAP)                                           | Ferritin 3                                                                  | 2.0   | 0.011 | Ferritin                    |
| P02120 (20,25DAP)                                        | GDSL-motif lipase/hydrolase                                                 | 3.0   | 0.022 | Oil body degradation        |
| <b>DISEASE &amp; STRESS TOLERANCE (17)</b>               |                                                                             |       |       |                             |
| P03051 (25,35DAP)                                        | Alcohol dehydrogenase                                                       | 3.3   | 0.004 | Alcohol dehydrogenase       |
| P02489 (25,35DAP)                                        | Alcohol dehydrogenase                                                       | 2.8   | 0.002 | Alcohol dehydrogenase       |
| P03230 (25DAP)                                           | Alcohol dehydrogenase                                                       | 3.0   | 0.011 | Alcohol dehydrogenase       |
| P02861 (25DAP)                                           | Alcohol dehydrogenase                                                       | 2.0   | 0.001 | Alcohol dehydrogenase       |
| P04420                                                   | Formate dehydrogenase 1, mitochondrial                                      | 2.1   | 0.017 | Formate dehydrogenase       |
| P00931                                                   | (Benzo)quinone oxidoreductase                                               | 2.2   | 0.025 | ROS response                |
| P01432 (20DAP)                                           | Thioredoxin                                                                 | 35.5  | 0.000 | Detoxification              |
| P01032                                                   | Glutathione S-transferase                                                   | 2.3   | 0.047 | Detoxification              |
| P03755 (25,35DAP)                                        | Phospholipid hydroperoxide glutathione peroxidase                           | 2.3   | 0.010 | Detoxification              |
| P02353 (35DAP)                                           | Cupredoxin                                                                  | 23.1  | 0.007 | Detoxification              |
| P01497 (20DAP)                                           | Ferredoxin 1                                                                | 8.2   | 0.002 | Detoxification              |
| P04171 (25,35DAP)                                        | Metallothionein-like protein 1 (MT-1)                                       | 3.8   | 0.001 | Detoxification              |
| P02134 (35DAP)                                           | Dienelactone hydrolase ( $\alpha\beta$ -hydrolase)                          | 2.7   | 0.038 | Detoxification              |
| P02815 (20,35DAP)                                        | Dehydration-responsive protein RD22                                         | 28.4  | 0.033 | Drought response            |
| P02219 (35DAP)                                           | Subtilisin proteinase inhibitor                                             | 3.2   | 0.041 | Disease response            |
| P01896 (35DAP)                                           | Disease resistance protein RGA2                                             | 2.4   | 0.037 | Disease response            |
| P01206 (25,35DAP)                                        | Syntaxin-132 (AtSYP132)                                                     | 2.0   | 0.001 | Cell proliferation          |
| <b>SIGNALING &amp; HORMONAL FUNCTIONS (16)</b>           |                                                                             |       |       |                             |
| P01758 (35DAP)                                           | WRKY-24/32 transcription factor                                             | 2.1   | 0.001 | Trancription factor         |
| P01092                                                   | Myb family transcription factor                                             | 3.0   | 0.013 | Trancription factor         |
| P02122 (20,25DAP)                                        | MYB-112/50 TF, Tuber-specific and sucrose-responsive element binding factor | 2.0   | 0.010 | Trancription factor         |
| P04334                                                   | FUSCA-3                                                                     | 2.5   | 0.018 | Trancription factor         |
| P04065                                                   | Transcriptional coactivator/pterin dehydratase                              | 4.8   | 0.005 | Trancriptional activation   |
| P02441                                                   | MAP kinase PsMAPK2                                                          | 4.5   | 0.040 | Protein phosphorylation     |
| P00766                                                   | MAPKK                                                                       | 4.4   | 0.001 | Protein phosphorylation     |
| P01662 (35DAP)                                           | MAP kinase, Medicago                                                        | 2.1   | 0.000 | Protein phosphorylation     |
| P02825 (35DAP)                                           | Receptor-like protein kinase 3                                              | 3.3   | 0.005 | Protein phosphorylation     |
| P00010 (20DAP)                                           | Ser/Thr-protein kinase receptor (S-receptor kinase, SRK)                    | 2.2   | 0.015 | Protein phosphorylation     |
| P01965                                                   | Ser/Thr-protein kinase SAPK7, Osmotic stress/ABA-activated protein kinase 7 | 2.0   | 0.024 | Protein phosphorylation     |
| P02807 (20,35DAP)                                        | Ca-dependent protein kinase CPK1                                            | 2.3   | 0.039 | Protein phosphorylation     |
| P00679                                                   | NAC domain-containing protein 78 (ANAC078)                                  | 2.2   | 0.014 | DNA binding                 |
| P02259 (25,35DAP)                                        | Homeobox protein                                                            | 3.2   | 0.050 | Homeotic functions          |
| P01656 (25DAP)                                           | Auxin-responsive protein IAA8                                               | 2.5   | 0.043 | Auxin function repression   |
| P04005 (20DAP)                                           | Ent-kaurenic acid oxidase 1 (KAO1, CyP450 88A3)                             | 2.1   | 0.039 | GA functions                |
| <b>PHOTOSYNTHESIS (5)</b>                                |                                                                             |       |       |                             |
| P01039                                                   | PS II reaction center protein I (PSII-I)                                    | 2.6   | 0.004 | Photosynthesis              |
| P01038 (25DAP)                                           | PS II reaction center protein I (PSII-I)                                    | 2.5   | 0.032 | Photosynthesis              |
| P00009 (25DAP)                                           | PSII D1 reaction center                                                     | 2.3   | 0.000 | Photosynthesis              |
| P01714                                                   | PS II reaction center                                                       | 2.0   | 0.012 | Photosynthesis              |
| P00854 (25DAP)                                           | CAB-8                                                                       | 3.2   | 0.027 | Chlorophyll binding protein |
| <b>TRANCRITION &amp; TRANSLATION &amp; HISTONES (54)</b> |                                                                             |       |       |                             |
| P00844                                                   | Elongation factor EF-2                                                      | 11.0  | 0.014 | Translation                 |
| P01177                                                   | Elongation factor 1-alpha (EF-1-alpha)                                      | 2.0   | 0.005 | Translation                 |
| P01474                                                   | Elongation factor 1-alpha                                                   | 2.6   | 0.009 | Translation                 |
| P01687 (35DAP)                                           | Translation initiation factor                                               | 2.2   | 0.008 | Translation                 |
| P00741                                                   | Peptidyl-tRNA hydrolase                                                     | 2.0   | 0.023 | Translation                 |
| P01728                                                   | Nascent polypeptide-associated complex NAC                                  | 3.7   | 0.027 | Translation                 |
| P00629                                                   | DEAD box RNA helicase                                                       | 3.3   | 0.015 | Translation                 |
| P00457 (25DAP)                                           | DNA-directed RNA polymerase                                                 | 2.2   | 0.030 | Translation                 |
| P02221 (25DAP)                                           | WD repeat protein pop3                                                      | 2.0   | 0.002 | mRNA processing             |
| P01325 (20,25DAP)                                        | Poly(A)-binding protein                                                     | 18.0  | 0.002 | mRNA processing             |
| P04576                                                   | RNA-binding protein, chloroplast                                            | 3.0   | 0.030 | mRNA processing             |
| P02581                                                   | 60S ribosomal protein L22-2                                                 | 180.2 | 0.024 | Ribosomal protein           |
| P01384                                                   | Ribosomal protein L28                                                       | 25.4  | 0.002 | Ribosomal protein           |
| P04287                                                   | 40S ribosomal protein S13                                                   | 7.4   | 0.005 | Ribosomal protein           |
| P03529                                                   | 40S ribosomal protein S7                                                    | 5.1   | 0.012 | Ribosomal protein           |
| P01485                                                   | Ribosomal protein 27a                                                       | 4.8   | 0.021 | Ribosomal protein           |
| P01182                                                   | Ribosomal protein L27                                                       | 3.8   | 0.002 | Ribosomal protein           |
| P04216                                                   | 60S ribosomal protein L10A                                                  | 3.5   | 0.021 | Ribosomal protein           |
| P02342                                                   | Ribosomal protein L8, cytosolic                                             | 3.1   | 0.000 | Ribosomal protein           |
| P02096                                                   | Ribosomal RNA- processing protein                                           | 3.0   | 0.015 | Ribosomal protein           |

|        |                                       |     |       |                   |
|--------|---------------------------------------|-----|-------|-------------------|
| P04553 | Ribosomal protein S3a                 | 3.0 | 0.000 | Ribosomal protein |
| P02048 | 60S RIBOSOMAL PROTEIN                 | 2.9 | 0.049 | Ribosomal protein |
| P02286 | 40S ribosomal protein S24             | 2.7 | 0.002 | Ribosomal protein |
| P01105 | Ribosomal protein L27a                | 2.7 | 0.036 | Ribosomal protein |
| P02854 | Ribosomal protein L10a                | 2.4 | 0.020 | Ribosomal protein |
| P04304 | 40S ribosomal protein S11             | 2.4 | 0.013 | Ribosomal protein |
| P04387 | Ribosomal protein s19                 | 2.3 | 0.021 | Ribosomal protein |
| P04388 | 40S ribosomal protein S9              | 2.2 | 0.031 | Ribosomal protein |
| P01797 | 60S ribosomal protein L21             | 2.2 | 0.041 | Ribosomal protein |
| P02959 | 60S ribosomal protein L19             | 2.1 | 0.017 | Ribosomal protein |
| P01202 | 40S ribosomal protein S30             | 2.1 | 0.010 | Ribosomal protein |
| P02984 | 60S ribosomal protein                 | 2.1 | 0.008 | Ribosomal protein |
| P00082 | Ribosomal protein L35, chloropl.      | 2.0 | 0.006 | Ribosomal protein |
| P02080 | Ribosomal protein L13                 | 2.0 | 0.022 | Ribosomal protein |
| P02330 | 60S ribosomal protein L13-1           | 2.0 | 0.010 | Ribosomal protein |
| P01081 | 28 kDa ribonucleoprotein, chloroplast | 2.1 | 0.001 | Ribosomal protein |
| P01501 | Histone H4                            | 2.3 | 0.037 | Histone           |
| P04584 | Histone H4                            | 2.3 | 0.008 | Histone           |
| P02017 | Histone H3                            | 2.3 | 0.003 | Histone           |
| P04684 | Histone H2A                           | 2.3 | 0.005 | Histone           |
| P01951 | Histone H4                            | 2.5 | 0.029 | Histone           |
| P02532 | Histone H4                            | 2.5 | 0.012 | Histone           |
| P01924 | Histone H2B                           | 2.5 | 0.042 | Histone           |
| P03703 | Histone H2B                           | 2.7 | 0.006 | Histone           |
| P02006 | Histone H2A                           | 2.9 | 0.011 | Histone           |
| P02444 | Histone H4                            | 3.2 | 0.003 | Histone           |
| P01899 | Histone H2B                           | 3.3 | 0.009 | Histone           |
| P04375 | Histone H1. b                         | 3.5 | 0.006 | Histone           |
| P02404 | Histone H1                            | 2.1 | 0.001 | Histone           |
| P04858 | Histone H2B1                          | 2.1 | 0.021 | Histone           |
| P02173 | Histone H2B1                          | 4.6 | 0.002 | Histone           |
| P03596 | Histone H2B                           | 2.1 | 0.016 | Histone           |
| P02318 | Histone H1                            | 2.1 | 0.019 | Histone           |
| P01983 | Histone H3                            | 3.9 | 0.042 | Histone           |

#### Upregulated, no annotation (99)

#### 30 DAP down (117)

| Seq. ID                                                     | Gene Annotation                                                              | Factor | P     | Function                          |
|-------------------------------------------------------------|------------------------------------------------------------------------------|--------|-------|-----------------------------------|
| <b>PRIMARY &amp; SECONDARY METABOLISM (21)</b>              |                                                                              |        |       |                                   |
| P03795                                                      | Phosphoglycerate mutase                                                      | 2.3    | 0.008 | Glycolysis                        |
| P04974 (35DAP)                                              | Fructose-bisphosphate aldolase, cytoplasm                                    | 2.0    | 0.004 | Glycolysis                        |
| P03767 (25DAP)                                              | Pyruvate kinase, chloroplast                                                 | 2.3    | 0.005 | Glycolysis                        |
| P03214 (35DAP)                                              | Invertase/pectin methyltransferase inhibitor                                 | 2.5    | 0.001 | CH metabolism                     |
| P05197                                                      | ADP-glucose pyrophosphorylase, small su                                      | 4.0    | 0.022 | Starch metabolism                 |
| P00655                                                      | ADP-glucose pyrophosphorylase, small su                                      | 2.4    | 0.005 | Starch metabolism                 |
| P04822 (25DAP)                                              | Glycosyl transferase (Galactinol synthase)                                   | 2.8    | 0.002 | Raffinose sugar metabolism        |
| P04337                                                      | 6-Phosphogluconate dehydrogenase, plastid                                    | 2.4    | 0.006 | Ser biosynthesis                  |
| P02864 (35DAP)                                              | Glutamine synthetase (Cytosolic GS1)                                         | 2.1    | 0.001 | Glu biosynthesis                  |
| P03631 (25,35DAP)                                           | UDP-glucuronosyl/UDP-glucosyltransferase                                     | 2.9    | 0.032 | Glucosyltransferase               |
| P05031                                                      | Ferredoxin--NADP reductase, chloroplast                                      | 2.7    | 0.011 | NADH oxidation                    |
| P03480 (25DAP)                                              | Cytochrome c oxidase                                                         | 2.3    | 0.003 | Respiration                       |
| P05167                                                      | SAM-dependent methyltransferase                                              | 2.0    | 0.025 | Methylation cycle                 |
| P03766 (25DAP)                                              | S-adenosylmethionine decarboxylase                                           | 2.8    | 0.009 | Methylation cycle                 |
| P03506 (35DAP)                                              | Enoyl-CoA hydratase/isomerase                                                | 3.0    | 0.002 | FA metabolism                     |
| P03551                                                      | Long-chain acyl-CoA synthetase 5                                             | 2.4    | 0.019 | FA metabolism                     |
| P02503 (35DAP)                                              | 3-ketoacyl-CoA synthase 10 (Fiddlehead-like protein)                         | 2.0    | 0.025 | FA metabolism                     |
| P01058 (25,35DAP)                                           | Adenosine deaminase                                                          | 6.3    | 0.006 | Purine metabolism                 |
| P04410 (35DAP)                                              | 5-phosphoribosyl-1-pyrophosphate amidotransferase                            | 2.7    | 0.022 | Nucleotide metabolism             |
| P03951 (25DAP)                                              | Inorganic pyrophosphatase                                                    | 2.5    | 0.005 | Pyrophosphatase                   |
| P01154 (25DAP)                                              | Phosphatidylinositol-glycan biosynthesis class C                             | 2.1    | 0.038 | Inositol metabolism               |
| <b>TRANSPORT (10)</b>                                       |                                                                              |        |       |                                   |
| P00852 (25DAP)                                              | OEP16.1, amino acid selective channel                                        | 4.2    | 0.001 | Plastidial outer membrane protein |
| P05186                                                      | Mitochondrial import receptor subunit TOM20                                  | 2.2    | 0.001 | Mitochondrial translocator        |
| P05161 (35DAP)                                              | Mitochondrial matrix protein frataxin, involved in Fe/S protein biosynthesis | 2.5    | 0.010 | Mitochondrial translocator        |
| P01824                                                      | Acyl carrier protein 4, chloroplast                                          | 4.0    | 0.017 | Lipid transport                   |
| P03790                                                      | Zinc transporter ZAT-1                                                       | 3.0    | 0.000 | Metal transport                   |
| P02762 (30DAP)                                              | Zinc transporter 4, chloroplast precursor (ZRT/IRT-like protein 4)           | 2.0    | 0.006 | Metal transport                   |
| P00469 (20DAP)                                              | Zinc transporter, ZIP4                                                       | 2.0    | 0.018 | Metal transport                   |
| P04444 (25DAP)                                              | Ca-ATPase, IIB (ER)                                                          | 2.0    | 0.028 | Ca transport                      |
| P03993                                                      | Aquaporin PIP-type 7a (Turgor-responsive protein 7a)                         | 2.2    | 0.005 | Water transport                   |
| P04982 (25,35DAP)                                           | Aquaporin, PIP-type 7a, turgor-responsive                                    | 2.0    | 0.001 | Water transport                   |
| <b>ENDOMEMBRANE TRANSPORT &amp; PROTEIN PROCESSING (14)</b> |                                                                              |        |       |                                   |
| P03208 (20DAP)                                              | Legumain                                                                     | 2.4    | 0.020 | Storage protein processing        |
| P04730                                                      | Ras small GTPase                                                             | 2.2    | 0.014 | Vesicle trafficking               |
| P04603                                                      | GTP-binding protein                                                          | .0     | 0.002 | Vesicle trafficking               |
| P04764 (25,35DAP)                                           | Chaperone HSC71.0, DnaK                                                      | 2.8    | 0.006 | Chaperone                         |
| P02041                                                      | HSP20-like chaperone                                                         | 2.0    | 0.016 | Chaperone                         |
| P04986                                                      | Chaperone multifunctional (14-3-3 family)                                    | 2.2    | 0.005 | Chaperone                         |
| P04972                                                      | Calreticulin                                                                 | 2.4    | 0.002 | Ca-binding chaperone              |
| P03666 (35DAP)                                              | Nonaspanin (TM9SF)                                                           | 3.0    | 0.002 | Vesicle trafficking               |
| P04914 (25DAP)                                              | Beta-Ig-H3/fasciclin                                                         | 2.6    | 0.014 | Vesicle trafficking               |
| P02510 (25DAP)                                              | Alpha-soluble NSF attachment protein                                         | 2.2    | 0.005 | Vesicle trafficking               |
| P01199                                                      | SNF7 family protein                                                          | 2.1    | 0.010 | Vesicle trafficking               |
| P05151                                                      | ADP-ribosylation factor GTP binding protein                                  | 2.4    | 0.004 | Vesicle trafficking               |
| P00059                                                      | Peptidyl-prolyl cis-trans isomerase                                          | 2.3    | 0.007 | Protein trafficking               |
| P05208 (25DAP)                                              | Peptidyl-prolyl cis-trans isomerase                                          | 2.2    | 0.002 | Protein trafficking               |
| <b>REGULATED PROTEIN DEGRADATION (15)</b>                   |                                                                              |        |       |                                   |
| P02453 (20,25DAP)                                           | Serine carboxypeptidase 1                                                    | 3.0    | 0.020 | Proteinase                        |
| P02708 (25,35DAP)                                           | Prolyl Oligopeptidase                                                        | 2.6    | 0.032 | Proteinase                        |

|                                                            |                                                                   |      |       |                                              |
|------------------------------------------------------------|-------------------------------------------------------------------|------|-------|----------------------------------------------|
| P01932 (35DAP)                                             | Ubiquitin-protein ligase/ zinc ion binding                        | 2.5  | 0.049 | Ubiquitin mediated protein degradation       |
| P01451 (25DAP)                                             | Cullin 3B                                                         | 2.3  | 0.040 | Ubiquitin mediated protein degradation       |
| P02115                                                     | Aspartic protease                                                 | 2.1  | 0.048 | Proteinase                                   |
| P03124 (25DAP)                                             | 20S core proteasome subunit alpha 2                               | 2.0  | 0.049 | Ubiquitin mediated protein degradation       |
| P03922                                                     | Aminoacylproline aminopeptidase                                   | 2.0  | 0.001 | Proteinase                                   |
| P02732                                                     | 26S proteasome regulatory subunit                                 | 2.0  | 0.003 | Ubiquitin mediated protein degradation       |
| P03243 (25,35DAP)                                          | Ubiquitin-conjugating enzyme E2                                   | 3.0  | 0.007 | Ubiquitin mediated protein degradation       |
| P02037                                                     | E3 ubiquitin-protein ligase                                       | 2.7  | 0.014 | Ubiquitin mediated protein degradation       |
| P00708                                                     | E3 ubiquitin-protein ligase LRSAM1                                | 2.3  | 0.006 | Ubiquitin mediated protein degradation       |
| P04419                                                     | Ubiquitin-conjugating enzyme, E2                                  | 2.1  | 0.018 | Ubiquitin mediated protein degradation       |
| P03356 (25DAP)                                             | Ubiquitin                                                         | 2.0  | 0.000 | Ubiquitin mediated protein degradation       |
| P04967                                                     | Thiol protease aleurain                                           | 2.2  | 0.001 | Proteinase                                   |
| P04140                                                     | Aspartic proteinase                                               | 2.2  | 0.008 | Proteinase                                   |
| <b>CELL PROLIFERATION (3)</b>                              |                                                                   |      |       |                                              |
| P03363 (20DAP)                                             | Expansin-like A2                                                  | 2.1  | 0.009 | Cell expansion                               |
| P02936                                                     | Xyloglucan endo-1,4-beta-D-glucanase                              | 2.1  | 0.012 | Cell wall metabolism                         |
| P03595                                                     | NAP1 microtubule regulating factor                                | 2.2  | 0.002 | Cell wall metabolism                         |
| <b>STORAGE RELATED (5)</b>                                 |                                                                   |      |       |                                              |
| P04448 (20,25DAP)                                          | Legumin A                                                         | 2.0  | 0.007 | Storage protein                              |
| P04995                                                     | Legumin K                                                         | 2.0  | 0.002 | Storage protein                              |
| P04441 (20,25DAP)                                          | Albumin 2                                                         | 2.3  | 0.000 | Storage protein                              |
| P04532 (20,25DAP)                                          | Glycinin subunit                                                  | 3.1  | 0.019 | Storage protein                              |
| P03272                                                     | Ferritin-3, chloroplast                                           | 3.5  | 0.019 | Ferritin                                     |
| <b>DISEASE &amp; STRESS TOLERANCE (15)</b>                 |                                                                   |      |       |                                              |
| P04246                                                     | Plant lipid transfer/seed storage/Trypsin-alpha amylase inhibitor | 5.7  | 0.008 | Pathogen response                            |
| P05016 (35DAP)                                             | Plant lipid transfer/seed storage/Trypsin-alpha amylase inhibitor | 4.0  | 0.007 | Pathogen response                            |
| P01528 (35DAP)                                             | Plant lipid transfer/seed storage/Trypsin-alpha amylase inhibitor | 3.6  | 0.001 | Pathogen response                            |
| P04349                                                     | Plant lipid transfer/seed storage/Trypsin-alpha amylase inhibitor | 2.1  | 0.006 | Pathogen response                            |
| P03274                                                     | Plant lipid transfer protein/Par allergen                         | 2.3  | 0.028 | Pathogen response                            |
| P03786 (25,35DAP)                                          | Alkaline phytoceramidase                                          | 2.6  | 0.001 | Defense against cell death                   |
| P00638 (25,35DAP)                                          | Trypsin/chymotrypsin inhibitor                                    | 3.9  | 0.010 | Pathogen response                            |
| P04644                                                     | Disease resistance response protein 206-d                         | 2.7  | 0.000 | Pathogen response                            |
| P04250 (25,35DAP)                                          | Pathogenesis-related protein 17                                   | 2.4  | 0.003 | Pathogen response                            |
| P03505                                                     | Germin-like protein                                               | 2.2  | 0.008 | Pathogen response                            |
| P00684 (35DAP)                                             | NADP-dependent oxidoreductase P1                                  | 2.1  | 0.007 | Defense                                      |
| P04569 (35DAP)                                             | Glycoside hydrolase, chitinase                                    | 2.2  | 0.033 | Pathogen response                            |
| P04908                                                     | Glycoside hydrolase, chitinase                                    | 2.1  | 0.008 | Pathogen response                            |
| P04811                                                     | Dehydration-responsive protein RD22                               | 2.2  | 0.002 | Drought response                             |
| P01277                                                     | Fibrillin 8                                                       | 2.1  | 0.003 | Lipid binding protein, stress/ABA responsive |
| <b>SIGNALING &amp; HORMONAL FUNCTIONS (14)</b>             |                                                                   |      |       |                                              |
| P02114 (35DAP)                                             | Two-component response regulator ARR5                             | 10.6 | 0.045 | CK functions                                 |
| P04794                                                     | Short chain dehydrogenase/reductase                               | 3.2  | 0.009 | Short-chain dehydrogenases/reductases        |
| P04123                                                     | 9-cis-epoxycarotenoid dioxygenase (NCED)                          | 2.8  | 0.001 | ABA biosynthesis                             |
| P04812                                                     | DELLA protein GAI                                                 | 2.6  | 0.006 | Repressor of GA functions                    |
| P05048 (25DAP)                                             | Phytochrome B                                                     | 2.5  | 0.002 | Signaling                                    |
| P03792 (25DAP)                                             | Thioredoxin h                                                     | 2.5  | 0.030 | Redox regulation                             |
| P04599 (35DAP)                                             | LEC1, transcription factor                                        | 2.2  | 0.030 | Transcription factor                         |
| P04407                                                     | BZIP transcription factor ATB2_2                                  | 2.0  | 0.003 | Transcription factor                         |
| P03681                                                     | Receptor-like Serine/Threonine kinase                             | 2.0  | 0.032 | Protein kinase                               |
| P00915 (20DAP)                                             | Protein kinase APK1A, chloroplast                                 | 2.0  | 0.001 | Protein kinase                               |
| P04464 (25DAP)                                             | Ferredoxin 3                                                      | 2.2  | 0.024 | Redox regulation                             |
| P01836                                                     | Carbohydrate kinase, PfkB                                         | 2.2  | 0.048 | Myo-inositol kinase                          |
| P01646 (35DAP)                                             | Protein-Tyrosine-phosphatase                                      | 2.1  | 0.028 | Protein phosphatase                          |
| P04793                                                     | Trehalose 6-phosphate synthase, class II                          | 2.0  | 0.043 | Trehalose signaling                          |
| <b>PHOTOSYNTHESIS (3)</b>                                  |                                                                   |      |       |                                              |
| P04462 (20,25DAP)                                          | PS II subunit (22kDa)                                             | 2.6  | 0.011 | Photosynthesis                               |
| P04368 (20,25DAP)                                          | Rubisco, small chain                                              | 2.1  | 0.005 | Photosynthesis                               |
| P05191 (35DAP)                                             | Thylakoid membrane phosphoprotein 14 kDa                          | 2.4  | 0.012 | Photosynthesis                               |
| <b>TRANSCRIPTION &amp; TRANSLATION &amp; HISTONES (17)</b> |                                                                   |      |       |                                              |
| P04154                                                     | Elongation factor G, chloroplast                                  | 3.3  | 0.014 | Trancription                                 |
| P02152                                                     | DEAD-box ATP-dependent RNA helicase 19                            | 4.9  | 0.013 | Trancription                                 |
| P04861                                                     | RNA polymerase II, RPB4                                           | 2.5  | 0.000 | Trancription                                 |
| P03465                                                     | DNA-directed RNA polymerase Iib                                   | 2.1  | 0.011 | Trancription                                 |
| P01397                                                     | Translation initiation factor 5A-4                                | 2.2  | 0.003 | Translation                                  |
| P04251                                                     | Elongation factor 1-alpha                                         | 2.1  | 0.017 | Translation                                  |
| P03599                                                     | Translation initiation factor 4G                                  | 2.0  | 0.024 | Translation                                  |
| P04844                                                     | Ribonuclease (translational inhibitor)                            | 2.0  | 0.010 | Translation                                  |
| P04386                                                     | Ribosomal protein s19                                             | 3.7  | 0.001 | Ribosomal protein                            |
| P04248                                                     | Ribosomal protein L17, cytosolic                                  | 2.7  | 0.001 | Ribosomal protein                            |
| P05120                                                     | Ribosomal protein S21                                             | 2.0  | 0.003 | Ribosomal protein                            |
| P03276                                                     | Ribosome recycling factor, chloroplast                            | 2.2  | 0.035 | Ribosomal protein                            |
| P04842                                                     | Small nuclear ribonucleoprotein                                   | 2.0  | 0.009 | Ribosomal protein                            |
| P04510                                                     | Histone H2B1                                                      | 2.1  | 0.015 | Histone                                      |
| P05146                                                     | Histone H2A                                                       | 3.2  | 0.000 | Histone                                      |
| P04348                                                     | Histone H1.41                                                     | 2.2  | 0.015 | Histone                                      |
| P04134 (20,30DAP)                                          | WD-40 repeat protein MSI1 (Core histone-binding su                | 2.1  | 0.001 | Histone binding protein                      |
| <b>Downregulated, no annotation (90)</b>                   |                                                                   |      |       |                                              |

| <b>35DAP up (134)</b>                                          |                                                                                         |        |       |                                        |
|----------------------------------------------------------------|-----------------------------------------------------------------------------------------|--------|-------|----------------------------------------|
| Seq. ID                                                        | Gene Annotation                                                                         | Factor | P     | Function                               |
| <b>PRIMARY &amp; SECONDARY METABOLISM &amp; TRANSPORT (29)</b> |                                                                                         |        |       |                                        |
| P00898 (20,30DAP)                                              | Sucrose-phosphate synthase                                                              | 2.7    | 0.003 | Sucrose metabolism                     |
| P00816                                                         | Fructose-bisphosphate aldolase, chloroplast                                             | 2.1    | 0.011 | Glycolysis                             |
| P01841 (30DAP)                                                 | Pyruvate dehydrogenase E1, beta subunit                                                 | 2.0    | 0.007 | Glycolysis                             |
| P01043                                                         | Enolase (2-phosphoglycerate dehydratase), cytoplasm                                     | 4.4    | 0.019 | Glycolysis                             |
| P02459 (25,30DAP)                                              | Glyceraldehyde-3-phosphate DH, cytosolic                                                | 2.4    | 0.006 | Glycolysis                             |
| P03466 (20,30DAP)                                              | Glycoside hydrolase                                                                     | 4.8    | 0.048 | CH metabolism                          |
| P01502 (30DAP)                                                 | UDP-glucose pyrophosphorylase                                                           | 2.3    | 0.001 | CH metabolism                          |
| P04097                                                         | ATP citrate lyase a-subunit, cytosol                                                    | 2.0    | 0.016 | CH metabolism, citrate degradation     |
| P01847 (25,30DAP)                                              | Nudix hydrolase, nucleoside sugar hydratase                                             | 3.0    | 0.016 | Nucleoside sugar catabolism            |
| P03815                                                         | Granule-bound starch synthase 1, chloroplast                                            | 4.5    | 0.001 | Starch metabolism                      |
| P00897                                                         | Phosphoglucan, water dikinase, chloroplast                                              | 2.0    | 0.001 | Starch metabolism                      |
| P01976 (25,30DAP)                                              | Starch phosphorylase, L chloroplast                                                     | 2.2    | 0.030 | Starch metabolism                      |
| P02005                                                         | L-asparaginase                                                                          | 3.0    | 0.001 | Amino acid metabolism                  |
| P02413                                                         | O-diphenol-O-methyl transferase                                                         | 2.0    | 0.001 | Methyltransferase                      |
| P01419 (20,30DAP)                                              | DNA (cytosine-5-)-methyltransferase                                                     | 2.6    | 0.049 | Methyltransferase                      |
| P01416 (25,30DAP)                                              | Adenylate kinase (ATP- AMP transphosphorylase), chloroplast                             | 2.2    | 0.012 | Nucleotide metabolism                  |
| P01821 (30DAP)                                                 | Phytoene synthase (geranylgeranyl-diphosphate geranylgeranyl transferase)               | 2.2    | 0.006 | Carotenoide synthesis                  |
| P02518                                                         | Spermidine synthase 1 (Putrescine aminopropyltransferase 1)                             | 22.9   | 0.038 | Polyamine biosynthesis                 |
| P04233 (25DAP)                                                 | 12-oxophytodienoic acid 10, 11-reductase, OPR2                                          | 2.0    | 0.039 | NADH oxidation                         |
| P04137                                                         | NADH-ubiquinone oxidoreductase, complex I NDUFS6                                        | 2.0    | 0.000 | NADH oxidation                         |
| P02713 (25DAP)                                                 | NADH-ubiquinone oxidoreductase 75 kDa subunit, mitochondrial                            | 2.0    | 0.018 | NADH oxidation                         |
| P00048                                                         | Quinolate phosphoribosyltransferase                                                     | 2.0    | 0.017 | NAD(+) biosynthesis                    |
| P02429                                                         | Acetyl-coenzyme A synthetase                                                            | 2.4    | 0.016 | Ac-CoA synthesis                       |
| P01076 (25DAP)                                                 | Delta 8-sphingolipid desaturase                                                         | 3.0    | 0.007 | FA metabolism                          |
| P01949                                                         | 1-acyl-sn-glycerol-3-phosphate acyltransferase PLS1, (Phospholipid synthesis protein 1) | 2.1    | 0.002 | FA metabolism                          |
| P01648 (30DAP)                                                 | MGDG synthase type A                                                                    | 2.0    | 0.022 | FA metabolism                          |
| P01223                                                         | Beta-1,3-glucanase                                                                      | 2.5    | 0.034 | Cell wall metabolism                   |
| P02670 (30DAP)                                                 | Beta3-glucuronyltransferase                                                             | 2.3    | 0.041 | Cell wall metabolism                   |
| P02042                                                         | Reversibly glycosylatable polypeptide                                                   | 3.0    | 0.037 | Cell wall metabolism                   |
| <b>TRANSPORT (6)</b>                                           |                                                                                         |        |       |                                        |
| P00784 (25,30DAP)                                              | Peptide transporter PTR2                                                                | 2.4    | 0.004 | Peptide transport                      |
| P04485 (25,30DAP)                                              | ATP synthase delta chain, mitochondrial                                                 | 3.3    | 0.016 | ATP synthesis                          |
| P01371                                                         | Import inner membrane translocase subunit TIM50, mitochondrial                          | 3.1    | 0.004 | Mitochondrial translocator             |
| P01734                                                         | Chloroplast inner membrane import protein Tic22                                         | 3.4    | 0.048 | Chloroplast translocator               |
| P02225 (25,30DAP)                                              | Uncoupling protein, mitochondrial                                                       | 2.9    | 0.028 | Respiratory control                    |
| P00853 (20DAP)                                                 | Boron transporter                                                                       | 2.4    | 0.012 | Transport                              |
| <b>ENDOMEMBRANE TRANSPORT &amp; PROTEIN PROCESSING (15)</b>    |                                                                                         |        |       |                                        |
| P00689 (25,30DAP)                                              | Coatomer subunit gamma                                                                  | 8.5    | 0.045 | Vesicle trafficking                    |
| P01526 (30DAP)                                                 | SNF7 protein                                                                            | 4.6    | 0.045 | Vesicle trafficking                    |
| P00213                                                         | Prenylated rab acceptor PRA1                                                            | 2.7    | 0.044 | Vesicle trafficking                    |
| P00502 (20DAP)                                                 | SNAP25 homologous protein (SNARE)                                                       | 2.0    | 0.024 | Vesicle trafficking                    |
| P02165 (30DAP)                                                 | Dolichyl-diphosphooligosaccharide-protein glycosyltransferase                           | 2.3    | 0.004 | Protein processing                     |
| P01988 (30DAP)                                                 | Ras-related protein Rab7D                                                               | 2.3    | 0.026 | Protein processing                     |
| P01279 (30DAP)                                                 | Peptidyl-prolyl cis- trans isomerase                                                    | 2.4    | 0.009 | Protein processing                     |
| P01573 (25,30DAP)                                              | Signal peptide peptidase                                                                | 2.3    | 0.032 | Protein processing                     |
| P02026                                                         | Chaperonin 20 kDa, chloroplast                                                          | 2.7    | 0.009 | Chaperone                              |
| P02333                                                         | Chaperonin 10, chloroplast                                                              | 3.4    | 0.043 | Chaperone                              |
| P02055 (30DAP)                                                 | Chaperone HSP20-like                                                                    | 2.2    | 0.002 | Chaperone                              |
| P03657 (25,30DAP)                                              | Chaperone (copper)                                                                      | 2.2    | 0.035 | Chaperone                              |
| P01606                                                         | Chaperone blp5, DnaK                                                                    | 2.0    | 0.013 | Chaperone                              |
| P00619 (25,30DAP)                                              | Heat shock protein Hsp90                                                                | 2.3    | 0.002 | Chaperone                              |
| P02258 (25,30DAP)                                              | Calreticulin                                                                            | 4.2    | 0.043 | Ca-binding chaperone (ER)              |
| <b>REGULATED PROTEIN DEGRADATION (7)</b>                       |                                                                                         |        |       |                                        |
| P02177                                                         | 26S proteasome regulatory subunit                                                       | 4.9    | 0.006 | Ubiquitin mediated protein degradation |
| P02498                                                         | 26S proteasome subunit S3-a                                                             | 2.0    | 0.024 | Ubiquitin mediated protein degradation |
| P02386 (30DAP)                                                 | Ubiquitin fusion degradation protein UFD1                                               | 2.3    | 0.025 | Ubiquitin mediated protein degradation |
| P03243 (25,30DAP)                                              | Ubiquitin-conjugating enzyme E2                                                         | 2.2    | 0.001 | Ubiquitin mediated protein degradation |
| P01932 (30DAP)                                                 | Ubiquitin-protein ligase                                                                | 2.2    | 0.001 | Ubiquitin mediated protein degradation |
| P00690 (25DAP)                                                 | E3 ubiquitin ligase                                                                     | 2.1    | 0.008 | Ubiquitin mediated protein degradation |
| P02708 (25,30DAP)                                              | Prolyl endopeptidase                                                                    | 2.5    | 0.001 | Protease                               |
| <b>CELL PROLIFERATION (10)</b>                                 |                                                                                         |        |       |                                        |
| P00178 (25,30DAP)                                              | Annexin                                                                                 | 2.7    | 0.014 | Cell proliferation                     |
| P03116                                                         | Annexin                                                                                 | 2.7    | 0.005 | Cell proliferation                     |
| P02931 (30DAP)                                                 | Annexin                                                                                 | 2.0    | 0.004 | Cell proliferation                     |
| P01817 (30DAP)                                                 | Tubulin-specific chaperone A                                                            | 2.2    | 0.032 | Cell proliferation                     |
| P02837 (30DAP)                                                 | Tubulin alpha                                                                           | 2.1    | 0.028 | Cell proliferation                     |
| P00033 (20,25DAP)                                              | Tubulin beta                                                                            | 2.0    | 0.005 | Cell proliferation                     |
| P02077                                                         | Ca(2+)-regulated actin-binding protein                                                  | 2.4    | 0.034 | Cell proliferation                     |
| P02293                                                         | MCM3 (Minichromosome maintenance protein 3)                                             | 4.1    | 0.046 | Cell proliferation                     |
| P01910 (30DAP)                                                 | Prohibitin                                                                              | 3.6    | 0.032 | Cell proliferation                     |
| P00884                                                         | ycf1-protein, chloroplast                                                               | 3.4    | 0.024 | Cell proliferation                     |
| <b>STORAGE RELATED (14)</b>                                    |                                                                                         |        |       |                                        |
| P04038 (25,30DAP)                                              | Vicilin A                                                                               | 11.1   | 0.005 | Storage protein                        |
| P04635 (30DAP)                                                 | Vicilin                                                                                 | 6.0    | 0.018 | Storage protein                        |
| P04533                                                         | Vicilin A                                                                               | 4.8    | 0.042 | Storage protein                        |
| P04616                                                         | Vicilin                                                                                 | 2.5    | 0.014 | Storage protein                        |
| P02231                                                         | Vicilin A                                                                               | 2.2    | 0.003 | Storage protein                        |
| P00635 (30DAP)                                                 | USP                                                                                     | 78.2   | 0.049 | Storage protein                        |
| P01146 (30DAP)                                                 | USP                                                                                     | 9.5    | 0.002 | Storage protein                        |
| P01292                                                         | USP                                                                                     | 7.0    | 0.003 | Storage protein                        |
| P01331                                                         | USP                                                                                     | 6.0    | 0.001 | Storage protein                        |
| P04466                                                         | USP                                                                                     | 4.4    | 0.001 | Storage protein                        |
| P02121                                                         | USP                                                                                     | 4.2    | 0.002 | Storage protein                        |
| P00940 (20,25DAP)                                              | USP                                                                                     | 3.8    | 0.032 | Storage protein                        |
| P04363                                                         | USP                                                                                     | 2.0    | 0.002 | Storage protein                        |
| P01844 (20,30DAP)                                              | USP                                                                                     | 3.1    | 0.009 | Storage protein                        |
| <b>DISEASE &amp; STRESS TOLERANCE (15)</b>                     |                                                                                         |        |       |                                        |
| P03051 (25,30DAP)                                              | Alcohol dehydrogenase                                                                   | 8.0    | 0.024 | Alcohol dehydrogenase                  |
| P02489 (25,30DAP)                                              | Alcohol dehydrogenase                                                                   | 4.2    | 0.029 | Alcohol dehydrogenase                  |
| P00931                                                         | (Benzo)quinone oxidoreductase                                                           | 2.1    | 0.014 | ROS response                           |
| P02428                                                         | (Benzo)quinone oxidoreductase                                                           | 2.0    | 0.035 | ROS response                           |
| P03755 (25,30DAP)                                              | Phospholipid hydroperoxide glutathione peroxidase                                       | 3.0    | 0.008 | Detoxification                         |
| P01200                                                         | Glutathione S-transferase                                                               | 2.3    | 0.015 | Detoxification                         |
| P02353 (30DAP)                                                 | Cupredoxin                                                                              | 2.7    | 0.045 | Detoxification                         |
| P01489                                                         | Cupredoxin                                                                              | 2.4    | 0.002 | Detoxification                         |
| P04171 (25,30DAP)                                              | Metallothionein-like protein 1 (MT-1).                                                  | 3.1    | 0.005 | Detoxification                         |
| P02134 (30DAP)                                                 | Dienelactone hydrolase                                                                  | 2.6    | 0.037 | Detoxification                         |
| P02815 (30DAP)                                                 | Dehydration-responsive protein RD22                                                     | 34.8   | 0.000 | Drought response                       |
| P01896 (30DAP)                                                 | Disease resistance protein RGA2                                                         | 2.7    | 0.010 | Disease response                       |
| P03402                                                         | Kunitz inhibitor ST1-like                                                               | 4.7    | 0.026 | Disease response                       |
| P02219 (30DAP)                                                 | Subtilisin proteinase inhibitor                                                         | 4.6    | 0.031 | Disease response                       |
| P01206 (25,30DAP)                                              | Syntaxin-132 (AtSYP132)                                                                 | 2.1    | 0.019 | Cell proliferation                     |
| <b>SIGNALING &amp; HORMONE FUNCTIONS (16)</b>                  |                                                                                         |        |       |                                        |

|                                                             |                                                                              |               |          |                                        |
|-------------------------------------------------------------|------------------------------------------------------------------------------|---------------|----------|----------------------------------------|
| P01758 (30DAP)                                              | WRKY-24/32 transcription factor                                              | 2.5           | 0.003    | Trancription factor                    |
| P01940                                                      | bZIP-TF / Dc3 promoter binding element                                       | 5.3           | 0.006    | Trancription factor                    |
| P00997                                                      | Serine/Threonine-protein phosphatase PP1                                     | 5.6           | 0.021    | Protein phosphorylation                |
| P02807 (20,30DAP)                                           | Ca-dependent protein kinase CPK1                                             | 2.1           | 0.019    | Protein phosphorylation                |
| P00484                                                      | Calcium-dependent protein kinase (CDPK)                                      | 2.0           | 0.008    | Protein phosphorylation                |
| P01662 (30DAP)                                              | MAP kinase, Medicago                                                         | 2.0           | 0.045    | Protein phosphorylation                |
| P01639                                                      | Protein phosphatase 2C                                                       | 2.8           | 0.046    | Protein phosphorylation                |
| P02825 (30DAP)                                              | Receptor-like protein kinase 3                                               | 2.8           | 0.018    | Protein phosphorylation                |
| P01965                                                      | Ser/Thr-protein kinase SAPPK7, Osmotic stress/ABA-activated protein kinase 7 | 2.4           | 0.015    | Protein phosphorylation                |
| P01268 (25DAP)                                              | EMB2737 (EMBRYO DEFECTIVE 2737)                                              | 2.1           | 0.028    | Embryogenesis                          |
| P02259 (25,30DAP)                                           | Homeobox protein                                                             | 2.0           | 0.012    | Homeotic functions                     |
| P02114                                                      | Two-component response regulator ARR5                                        | 4.2           | 0.016    | CK functions                           |
| P01142                                                      | Cytokinin dehydrogenase 5 (Cytokinin oxidase 5)                              | 2.0           | 0.033    | CK degradation                         |
| P01513                                                      | Inner membrane protein PPF-1, chloroplast                                    | 4.9           | 0.042    | Plastid biogenesis                     |
| P01335                                                      | GIANT CHLOROPLAST 1                                                          | 2.0           | 0.020    | Plastid division                       |
| P00791                                                      | NAC domain-containing protein 29                                             | 3.0           | 0.012    | Cell proliferation                     |
| <b>TRANSCRIPTION &amp; TRANSLATION &amp; HISTONES (22)</b>  |                                                                              |               |          |                                        |
| P02494                                                      | Translation initiation factor 3g                                             | 2.7           | 0.036    | Translation                            |
| P01687 (30DAP)                                              | Translation initiation factor                                                | 2.2           | 0.008    | Translation                            |
| P00844                                                      | Elongation factor EF-2                                                       | 2.1           | 0.039    | Translation                            |
| P01682                                                      | Methionyl-tRNA synthetase                                                    | 2.0           | 0.015    | Translation                            |
| P00741 (20,30DAP)                                           | Peptidyl-tRNA hydrolase                                                      | 2.0           | 0.014    | Translation                            |
| P01518                                                      | RNA-binding protein RNP-1                                                    | 4.9           | 0.007    | Translation                            |
| P02000                                                      | SNF2 domain-containing protein (helicase)                                    | 2.3           | 0.019    | Translation                            |
| P01384                                                      | Ribosomal protein L28                                                        | 8.1           | 0.006    | Translation                            |
| P01994                                                      | 30S ribosomal protein S10, chloroplast                                       | 2.5           | 0.003    | Ribosomal protein                      |
| P00082                                                      | Ribosomal protein L35, chloroplast                                           | 2.1           | 0.035    | Ribosomal protein                      |
| P01485                                                      | Ribosomal protein 27a                                                        | 2.1           | 0.028    | Ribosomal protein                      |
| P01594                                                      | Nuclear ribonucleoprotein                                                    | 2.5           | 0.002    | Ribosomal protein                      |
| P01571                                                      | Nuclear ribonucleoprotein                                                    | 2.4           | 0.029    | Ribosomal protein                      |
| P01577                                                      | Small nuclear ribonucleoprotein                                              | 2.0           | 0.001    | Ribosomal protein                      |
| P01147 (25DAP)                                              | Transducin family protein / WD-40 repeat                                     | 2.5           | 0.003    | Pre-mRNA splicing                      |
| P02173                                                      | Histone H2B1                                                                 | 2.1           | 0.011    | Histone                                |
| P02404                                                      | Histone H1                                                                   | 2.0           | 0.043    | Histone                                |
| P04063                                                      | Histone H3-K9 methyltransferase                                              | 2.0           | 0.017    | Histone                                |
| P02006                                                      | Histone H2A                                                                  | 2.2           | 0.039    | Histone                                |
| P00150                                                      | Histone H3                                                                   | 2.1           | 0.014    | Histone                                |
| P02532                                                      | Histone H4                                                                   | 2.4           | 0.002    | Histone                                |
| P01955                                                      | Histone H4                                                                   | 2.8           | 0.029    | Histone                                |
| <b>Upregulated, no annotation (71)</b>                      |                                                                              |               |          |                                        |
| <b>35 DAP down (97)</b>                                     |                                                                              |               |          |                                        |
| <b>Seq. ID</b>                                              | <b>Gene Annotation</b>                                                       | <b>Factor</b> | <b>P</b> | <b>Function</b>                        |
| <b>PRIMARY &amp; SECONDARY METABOLISM (24)</b>              |                                                                              |               |          |                                        |
| PCPS17 (25DAP)                                              | Sucrose synthase isoform 3                                                   | 4.9           | 0.001    | Sucrose metabolism                     |
| P04974 (30DAP)                                              | Fructose-bisphosphate aldolase, cytoplasm                                    | 2.4           | 0.015    | Glycolysis                             |
| P03795                                                      | Phosphoglycerate mutase                                                      | 2.4           | 0.003    | Glycolysis                             |
| P05105 (30DAP)                                              | D-3-phosphoglycerate dehydrogenase                                           | 2.1           | 0.020    | Glycolysis                             |
| P03214 (30DAP)                                              | Invertase/pectin methylesterase inhibitor                                    | 8.7           | 0.026    | CH metabolism                          |
| P05197                                                      | ADP-glucose pyrophosphorylase, small su                                      | 4.2           | 0.016    | Starch metabolism                      |
| P02602 (25DAP)                                              | Beta-amylase                                                                 | 2.0           | 0.026    | Starch metabolism                      |
| P04822 (25,30DAP)                                           | Glycosyl transferase (Galactinol synthase)                                   | 2.7           | 0.002    | Raffinose sugar metabolism             |
| P03631 (25,30DAP)                                           | UDP-glucuronosyl/UDP-glucosyltransferase                                     | 2.1           | 0.008    | Glucosyltransferase                    |
| P02222                                                      | Inositol monophosphatase                                                     | 3.1           | 0.025    | Inositol metabolism                    |
| P04337                                                      | 6-phosphogluconate dehydrogenase, plastid                                    | 2.0           | 0.013    | Pentose-P cycle                        |
| P00518 (25DAP)                                              | Glutamine synthetase, GS1, cytosolic                                         | 2.0           | 0.039    | Amino acid metabolism                  |
| P02864 (30DAP)                                              | Glutamine synthetase, GS1, cytosolic                                         | 2.0           | 0.015    | Amino acid metabolism                  |
| P04556                                                      | Serine-glyoxylate aminotransferase                                           | 2.5           | 0.038    | Transamination                         |
| P04838 (25DAP)                                              | Extradial ring-cleavage dioxygenase, class III enzyme                        | 2.2           | 0.002    | Aromatic compound metabolism           |
| P01058 (25,30DAP)                                           | Adenosine deaminase                                                          | 2.2           | 0.043    | Purine metabolism                      |
| P00512 (30DAP)                                              | NADPH-cytochrome p450 reductase                                              | 2.2           | 0.044    | NADH oxidation                         |
| P04410 (30DAP)                                              | Purine/pyrimidine phosphoribosyl transferase, chloroplast                    | 2.3           | 0.047    | Nucleotide metabolism                  |
| P04705                                                      | Dihydropyrimidinase                                                          | 2.2           | 0.026    | Nucleotide metabolism                  |
| P02503 (30DAP)                                              | 3-ketoacyl-CoA synthase 10 (Fiddlehead-like protein)                         | 2.1           | 0.007    | FA metabolism                          |
| P03506 (30DAP)                                              | Enoyl-CoA hydratase/isomerase                                                | 2.7           | 0.004    | FA metabolism                          |
| P01842                                                      | Cytochrome b5                                                                | 2.4           | 0.045    | FA metabolism                          |
| P04840                                                      | Cytochrome b5                                                                | 2.4           | 0.018    | FA metabolism                          |
| P03786 (25,30DAP)                                           | Alkaline phytoceramidase                                                     | 2.0           | 0.008    | FA metabolism                          |
| <b>TRANSPORT (6)</b>                                        |                                                                              |               |          |                                        |
| P05161 (30DAP)                                              | Mitochondrial matrix protein frataxin, involved in Fe/S protein biosynthesis | 2.7           | 0.012    | Mitochondrial translocator             |
| P04487                                                      | Dicarboxylate/tricarboxylate carrier, mitochondrial                          | 2.5           | 0.017    | Mitochondrial translocator             |
| P04460                                                      | 36 kDa outer mitochondrial membrane protein porin (POM 36)                   | 2.1           | 0.007    | Mitochondrial translocator             |
| P03557                                                      | Vacuolar H+-transporting two-sector ATPase                                   | 2.1           | 0.012    | H+-Transport                           |
| P04982 (25,30DAP)                                           | Aquaporin, PIP-type 7a, turgor-responsive                                    | 2.1           | 0.007    | Water transport                        |
| P03782 (25DAP)                                              | K+ channel beta chain KB1                                                    | 2.0           | 0.001    | K+-transport                           |
| <b>ENDOMEMBRANE TRANSPORT &amp; PROTEIN PROCESSING (13)</b> |                                                                              |               |          |                                        |
| P03208 (20DAP)                                              | Legumain                                                                     | 2.4           | 0.020    | Storage protein processing             |
| P04764 (25,30DAP)                                           | Chaperone HSC71.0, DnaK                                                      | 3.3           | 0.005    | Chaperone                              |
| P04986                                                      | Chaperone multifunctional (14-3-3 family)                                    | 2.2           | 0.005    | Chaperone                              |
| P05151                                                      | ADP-ribosylation factor GTP binding protein)                                 | 2.2           | 0.007    | Vesicle trafficking                    |
| P04646                                                      | GTP-binding protein, ras-like                                                | 2.0           | 0.008    | Vesicle trafficking                    |
| P00159                                                      | EMB2001 (EMBRYO DEFECTIVE 2001); GTP binding                                 | 2.1           | 0.002    | Vesicle trafficking                    |
| P01402                                                      | Sec23/sec24 transport family protein                                         | 4.6           | 0.006    | Vesicle trafficking                    |
| P03666 (30DAP)                                              | Nonaspanin (TM9SF)                                                           | 3.1           | 0.005    | Vesicle trafficking                    |
| P05035 (25DAP)                                              | Microtubule-associated protein                                               | 2.5           | 0.009    | Vesicle trafficking                    |
| P04656                                                      | Protein disulfide-isomerase A6 (ER)                                          | 2.1           | 0.009    | Protein processing                     |
| P04414                                                      | Peptidyl-prolyl isomerase FKBP12                                             | 2.4           | 0.015    | Protein trafficking                    |
| P00059                                                      | Peptidyl-prolyl cis-trans isomerase                                          | 2.3           | 0.009    | Protein trafficking                    |
| P04242 (30DAP)                                              | Peptidyl-prolyl cis-trans isomerase                                          | 2.0           | 0.003    | Protein trafficking                    |
| <b>REGULATED PROTEIN DEGRADATION (14)</b>                   |                                                                              |               |          |                                        |
| P03205                                                      | Ubiquitin-conjugating enzyme, E2                                             | 2.8           | 0.027    | Ubiquitin mediated protein degradation |
| P04345                                                      | Ubiquitin-conjugating enzyme, E2                                             | 2.5           | 0.032    | Ubiquitin mediated protein degradation |
| P00977                                                      | Ubiquitin-protein ligase                                                     | 2.1           | 0.025    | Ubiquitin mediated protein degradation |
| P01398                                                      | Ubiquitin                                                                    | 2.6           | 0.027    | Ubiquitin mediated protein degradation |
| P03935                                                      | Skp1 (U3 ubiquitin ligase su)                                                | 2.5           | 0.010    | Ubiquitin mediated protein degradation |
| P02453 (20,25,30DAP)                                        | Serine carboxypeptidase 1                                                    | 3.0           | 0.020    | Proteinase                             |
| P02708 (25,30DAP)                                           | Prolyl Oligopeptidase                                                        | 2.6           | 0.032    | Proteinase                             |
| P01932 (30DAP)                                              | Ubiquitin-protein ligase/ zinc ion binding                                   | 2.5           | 0.049    | Ubiquitin mediated protein degradation |
| P01451 (25DAP)                                              | Cullin 3B                                                                    | 2.3           | 0.040    | Ubiquitin mediated protein degradation |
| P02115                                                      | Aspartic protease                                                            | 2.1           | 0.048    | Proteinase                             |
| P03124 (25DAP)                                              | 20S core proteasome subunit alpha 2                                          | 2.0           | 0.049    | Ubiquitin mediated protein degradation |
| P03922                                                      | Aminoacylproline aminopeptidase                                              | 2.0           | 0.001    | Proteinase                             |
| P02732                                                      | 26S proteasome regulatory subunit                                            | 1.9           | 0.003    | Ubiquitin mediated protein degradation |
| P03243 (25,30DAP)                                           | Ubiquitin-conjugating enzyme E2                                              | 3.0           | 0.007    | Ubiquitin mediated protein degradation |
| <b>CELL PROLIFERATION (2)</b>                               |                                                                              |               |          |                                        |
| P05156                                                      | Actin-depolymerizing factor 2 (ADF 2).                                       | 2.5           | 0.015    | Cell proliferation                     |
| P04743                                                      | Actin-depolymerizing factor 2 (ADF 2).                                       | 2.1           | 0.025    | Cell proliferation                     |

| <b>STORAGE RELATED (4)</b>                                 |                                                                   |      |       |                           |
|------------------------------------------------------------|-------------------------------------------------------------------|------|-------|---------------------------|
| P04996                                                     | Legumin B                                                         | 4.6  | 0.001 | Storage protein           |
| P04995                                                     | Legumin K                                                         | 3.4  | 0.015 | Storage protein           |
| PCPS13 (20DAP)                                             | Legumin B                                                         | 2.2  | 0.006 | Storage protein           |
| P05134                                                     | ABA-induced guard cell protein (LEA-like)                         | 7.2  | 0.010 | LEA protein               |
| <b>DISEASE &amp; STRESS TOLERANCE (9)</b>                  |                                                                   |      |       |                           |
| P04644                                                     | Disease resistance response protein 206-d                         | 7.5  | 0.001 | Pathogen response         |
| P05016 (30DAP)                                             | Plant lipid transfer/seed storage/Trypsin-alpha amylase inhibitor | 5.6  | 0.007 | Pathogen response         |
| P01528 (30DAP)                                             | Plant lipid transfer/seed storage/Trypsin-alpha amylase inhibitor | 2.1  | 0.000 | Pathogen response         |
| P00684 (30DAP)                                             | NADP-dependent oxidoreductase P1                                  | 2.1  | 0.011 | NADH oxidation            |
| P00638 (25,30DAP)                                          | Trypsin/chymotrypsin inhibitor                                    | 2.2  | 0.008 | Pathogen response         |
| P04250 (25,30DAP)                                          | Pathogenesis-related protein 17                                   | 5.4  | 0.000 | Pathogen response         |
| P04569 (30DAP)                                             | Glycoside hydrolase, chitinase                                    | 2.8  | 0.010 | Pathogen response         |
| P04867 (25DAP)                                             | Superoxide dismutase                                              | 3.4  | 0.007 | Detoxification            |
| P02585                                                     | Metallothioneine                                                  | 2.8  | 0.000 | Detoxification            |
| <b>SIGNALING &amp; HORMONAL FUNCTIONS (7)</b>              |                                                                   |      |       |                           |
| P02114                                                     | Two-component response regulator ARR5                             | 10.6 | 0.045 | CK functions              |
| P04812                                                     | DELLA protein GAI                                                 | 2.4  | 0.003 | Repressor of GA functions |
| P04341                                                     | Short-chain alcohol dehydrogenase                                 | 3.4  | 0.030 | SDR family                |
| P04599 (30DAP)                                             | LEC1, transcription factor                                        | 2.1  | 0.036 | Transcription factor      |
| P02886                                                     | Protein kinase                                                    | 2.3  | 0.034 | Protein kinase            |
| P05090                                                     | Protein phosphatase                                               | 2.2  | 0.007 | Protein kinase            |
| P01646 (30DAP)                                             | Protein-tyrosine-phosphatase                                      | 2.1  | 0.026 | Protein kinase            |
| <b>PHOTOSYTHESIS (2)</b>                                   |                                                                   |      |       |                           |
| P04559 (25DAP)                                             | Photosystem II protein PsbX                                       | 2.0  | 0.006 | Photosynthesis            |
| P05191 (30DAP)                                             | Thylakoid membrane phosphoprotein 14 kDa                          | 2.4  | 0.004 | Photosynthesis            |
| <b>TRANSCRIPTION &amp; TRANSLATION &amp; HISTONES (16)</b> |                                                                   |      |       |                           |
| P03634                                                     | Transcription elongation factor                                   | 2.2  | 0.002 | Transcription             |
| P03465                                                     | DNA-directed RNA polymerase Iib                                   | 2.0  | 0.009 | Transcription             |
| P04251                                                     | Elongation factor 1-alpha                                         | 3.0  | 0.023 | Translation               |
| P04154                                                     | Elongation factor G, chloroplast                                  | 2.9  | 0.030 | Translation               |
| P04741                                                     | Translation elongation factor 2                                   | 2.2  | 0.004 | Translation               |
| PCPS26                                                     | Translation elongation factor EF-1                                | 2.4  | 0.002 | Translation               |
| P04453                                                     | Translation elongation factor 2                                   | 2.1  | 0.020 | Translation               |
| P04886                                                     | Translation initiation factor SU11                                | 2.1  | 0.002 | Translation               |
| P01397                                                     | Translation initiation factor 5A-4                                | 2.0  | 0.019 | Translation               |
| P04844                                                     | Ribonuclease (translational inhibitor)                            | 2.1  | 0.015 | Translation               |
| P00042                                                     | Ribosomal protein L25                                             | 3.1  | 0.019 | Ribosomal protein         |
| P04315                                                     | Ribosomal protein S27E                                            | 2.6  | 0.001 | Ribosomal protein         |
| P03181                                                     | 40S ribosomal protein S25                                         | 2.5  | 0.029 | Ribosomal protein         |
| P04248                                                     | Ribosomal protein L17, cytosolic                                  | 2.0  | 0.004 | Ribosomal protein         |
| P04201                                                     | 40S ribosomal protein S15a-1                                      | 2.2  | 0.008 | Ribosomal protein         |
| P04291                                                     | Ribosomal protein S13, cytosolic                                  | 2.0  | 0.007 | Ribosomal protein         |
| <b>Downregulated, no annotation (60)</b>                   |                                                                   |      |       |                           |
